# 1 Evolutionary Stalling in the Optimization of 2 the Translation Machinery

3 Sandeep Venkataram<sup>1</sup>, Ross Monasky<sup>2</sup>, Shohreh H Sikaroodi<sup>1,3</sup>, Sergey  
4 Kryazhimskiy<sup>1,\*†</sup>, Betül Kaçar<sup>2,\*†</sup>

5 <sup>1</sup>Division of Biological Sciences, University of California San Diego, La Jolla, CA 92093;

6 <sup>2</sup>Department of Molecular and Cellular Biology, University of Arizona, Tucson, AZ 85721;

7 <sup>3</sup>Current address: Molecular engineering group, Fate Therapeutics Inc.

8 \*Equal contribution

9 †Corresponding authors: [betul@arizona.edu](mailto:betul@arizona.edu), [skryazhi@ucsd.edu](mailto:skryazhi@ucsd.edu)

## 10 Abstract

11 Biological organisms are modular. Theory predicts that natural selection would steadily improve  
12 modules towards their performance optima up to the margin of effective neutrality. This classical  
13 theory may break down for populations evolving in the clonal interference regime because  
14 natural selection may focus on some modules while adaptation of others stalls. Such evolutionary  
15 stalling has not been observed and it is unclear whether it limits the power of natural selection to  
16 optimize module performance. To empirically characterize evolutionary stalling, we evolved  
17 populations of *Escherichia coli* with genetically perturbed translation machineries (TMs). We  
18 show that populations with different suboptimal TMs embark on statistically distinct trajectories  
19 of TM optimization. Yet, before TMs approach the margin of effective neutrality, the focus of  
20 natural selection shifts to other cellular modules, and TM optimization stalls. Our results suggest  
21 that module optimization within an organism may take much longer than suggested by classical  
22 theory.

23

## 24 Introduction

25 Biological systems are organized hierarchically, from molecules to cells, organisms and  
26 populations [1–5]. At the lowest level, molecules within cells form functional modules, such as  
27 the translation machinery, or various other metabolic pathways [4,6–9]. Organismal fitness  
28 depends on the performance of these modules. However, the ability of natural selection to optimize  
29 cellular modules is constrained by the abundance and the effects of available beneficial mutations.

30 In the simplest case, the speed of evolutionary optimization of a module depends only on the  
31 supply and the fitness effects of beneficial mutations in that module. Theoretical models predict  
32 that the fitness effects of beneficial mutations will decline as the module’s performance approaches  
33 an optimum. Therefore, the module’s performance is expected to improve steadily, albeit with a  
34 gradually declining rate [10–21]. When the module’s performance approaches the optimum and  
35 the fitness effects of beneficial mutations drop below  $\sim 1/N$ , the inverse of the population size, the  
36 optimization of the module by natural selection stops [12,22–24].

37 In reality, evolution of any one module within an organism depends on the supply and effects of  
38 beneficial mutations in all modules. One reason for this interdependence is that modules are  
39 encoded in genomes, and genomes are physically linked [25]. Therefore, new beneficial mutations  
40 affecting different modules must compete against each other in the population whenever they  
41 simultaneously arise on different genetic backgrounds [25–29]. This effect, known as “clonal  
42 interference”, is particularly strong when recombination is rare and the supply of adaptive  
43 mutations is large [25,28], e.g., if the organism reproduces asexually, the population is large and  
44 the environment is new. In the clonal interference regime, small-effect mutations are usually  
45 outcompeted. Instead, adaptation is driven by mutations that provide fitness benefits above a  
46 certain “clonal interference” threshold, which depends on the current supply and the fitness effects  
47 of all adaptive mutations in the genome [25,29,30].

48 Beneficial mutations in different modules likely arise at different rates and have different effects  
49 on the fitness of the organism. Therefore, natural selection will be “focused” on optimizing  
50 modules where mutations have effects above the clonal interference threshold, while other  
51 modules would adapt slowly or not at all. Modules that are more important for fitness in the current  
52 environment and those that are farther from their performance optima are expected to contribute  
53 more large-effect mutations. Such modules are more likely to be in the focus of natural selection.  
54 However, as natural selection improves the performance of any such module, the supply and  
55 effects of adaptive mutations in that module will decline. Eventually, further improvements will  
56 only be possible by mutations with effects below the clonal interference threshold. At this point,  
57 the evolutionary optimization of the focal module will slow down or cease entirely. We call this  
58 phenomenon “evolutionary stalling”.

59 Evolutionary stalling imposes a limit on the power of natural selection to improve the performance  
60 of a module within an organism, in addition to the well known threshold of effective neutrality.  
61 While the effective neutrality threshold cannot be overcome, evolutionary optimization of a stalled  
62 module can resume once large-effect adaptive mutations in competing modules are exhausted.  
63 Nevertheless, stalling poses a potentially serious obstacle for the evolutionary optimization of a  
64 module because it can occur much farther from the optimum than the hard limit of effective  
65 neutrality.

66 The onset of evolutionary stalling has never been directly observed. Experiments in microbes show  
67 that the conditions for the onset of stalling are generally favorable. First, microbial populations  
68 usually evolve in the clonal interference regime [26,31–35]. Second, when healthy strains adapt to  
69 benign laboratory conditions, multiple different cellular processes are affected by beneficial  
70 mutations, which suggests that multiple modules can be potentially improved by natural selection  
71 [32,36–41]. On the other hand, when an important cellular module is genetically disrupted or the  
72 environment is harsh, natural selection is focused on a single module [38,39,41–50]. In these cases,  
73 once the poorly performing module is sufficiently improved, we expect that its further optimization  
74 would eventually stall, and the focus of natural selection would shift to other modules that are still  
75 suboptimal. This transition in the focus of selection has not been characterized. In particular, it  
76 remains unknown how close to the performance optimum natural selection is able to push an  
77 initially defective module before the onset of stalling.

78 Evolutionary stalling can be detected in two ways. If we can directly measure the performance of  
79 a module over time, an abrupt reduction in the rate of its phenotypic improvement despite steady  
80 increases in fitness would potentially indicate the onset of stalling. Alternatively, if we know all  
81 the genes that encode a module, we could potentially infer the onset of stalling from an abrupt  
82 reduction in the rate of accumulation of mutations in such genes despite continued accumulation  
83 of beneficial mutations elsewhere in the genome. Both approaches are challenging because it is  
84 often unclear what aspects of a module's performance are relevant for fitness and because in  
85 general the location of the performance optima and the identities of all genes that encode modules  
86 are unknown.

87 Here, we experimentally examine the evolution of the translation machinery (TM), one of the best  
88 annotated and characterized cellular modules [8,9,51–53]. This choice allows us to use the  
89 genomic approach for detecting evolutionary stalling. Extant TMs are unique in that they are close  
90 to their theoretical performance optimum [54], which allows us to estimate how far from the  
91 margin of effective neutrality stalling occurs. We disrupted the TM by replacing the native  
92 translation Elongation Factor Tu (EF-Tu) in the bacterium *Escherichia coli* (*E. coli*) with its  
93 orthologs [55–57]. We then evolved these strains in rich media where rapid and accurate  
94 translation is required for fast growth [58,59]. We expect that natural selection will favor mutations  
95 that repair the initial TM defects. We characterize the onset of evolutionary stalling in the TM in  
96 two ways. First, we observe substitutions in known TM genes only in strains with the most severe  
97 initial TM defects and quantify how far from the optimum stalling occurs. Second, we observe that  
98 mutations in TM genes are exhausted within evolving populations, which provides us with direct  
99 evidence for the onset of evolutionary stalling.

## 101 Results

102 We previously replaced the native EF-Tu in *E. coli* with its orthologs from *Salmonella*  
103 *typhimurium*, *Yersinia enterocolitica*, *Vibrio cholerae* and *Pseudomonas aeruginosa* and one  
104 reconstructed ancestral variant [55] (Table 1). EF-Tu is encoded in *E. coli* by two paralogous  
105 genes, *tufA* and *tufB*, with the majority of the EF-Tu molecules being expressed from *tufA* [60].  
106 To replace all EF-Tu molecules in the cells, the *tufB* gene was deleted and the foreign orthologs  
107 were integrated into the *tufA* locus [55]. We also included the control strain in which the *tufB*  
108 gene was deleted and the original *E. coli tufA* was left intact. We refer to the engineered  
109 “founder” *E. coli* strains as E, S, Y, V, A and P by the first letter of the origin of their *tuf* genes  
110 (Table 1).

111

| Strain | EF-Tu origin species              | Number of amino acid differences from <i>E. coli</i> EF-Tu (percent identity) | Fitness $\pm$ SEM, % per generation |
|--------|-----------------------------------|-------------------------------------------------------------------------------|-------------------------------------|
| E      | <i>Escherichia coli</i> (control) | 0 (100)                                                                       | $0 \pm 0.7$                         |
| S      | <i>Salmonella typhimurium</i>     | 1 (99.75)                                                                     | $+0.49 \pm 0.09$                    |
| Y      | <i>Yersinia enterocolitica</i>    | 24 (93.91)                                                                    | $-3.02 \pm 0.03$                    |
| V      | <i>Vibrio cholerae</i>            | 51 (87.06)                                                                    | $-19.0 \pm 1.1$                     |
| A      | Reconstructed ancestor            | 21 (94.67)                                                                    | $-34.4 \pm 0.7$                     |
| P      | <i>Pseudomonas aeruginosa</i>     | 62 (84.38)                                                                    | $-35.0 \pm 0.2$                     |

112 **Table 1. Founders used for the evolution experiment.** Strains with foreign EF-Tu orthologs are ordered by their fitness  
113 relative to the control E strain. SEM stands for standard error of the mean.

114 We first quantified the sub-optimality of the TMs in our founder strains. Kaçar et al. showed that  
115 EF-Tu replacements lead to declines in the *E. coli* protein synthesis rate and proportional losses  
116 in growth rate in the rich laboratory medium LB [55]. In our subsequent evolution experiment,  
117 natural selection will favor genotypes with higher competitive fitness, which may have other  
118 components in addition to growth rate [61–65]. We confirmed that EF-Tu replacements caused  
119 changes in competitive fitness relative to the control E strain (Table 1), and that competitive  
120 fitness and growth rate were highly correlated (Figure S1). We conclude that the competitive  
121 fitness of our founders in our environment reflects their TM performance. The fitness of the S  
122 and Y founders were similar to that of the control E strain ( $\leq 3\%$  fitness change) indicating that  
123 their TMs were at most mildly suboptimal. In contrast, the fitness of the V, A and P founders  
124 were dramatically lower ( $\geq 19\%$  fitness decline; Table 1) indicating that their TMs were severely  
125 suboptimal.

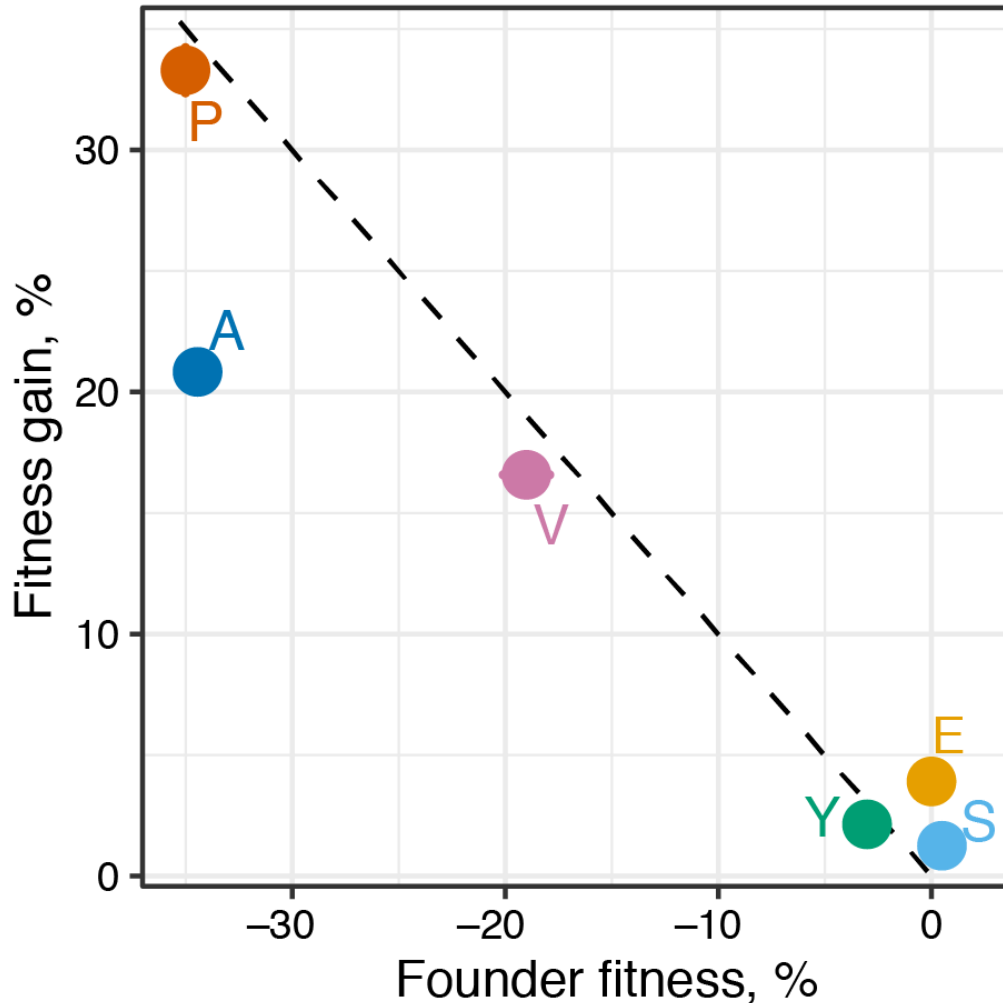

126  
127  
128  
129  
130  
131  
132

**Figure 1. Competitive fitness of founder and evolved populations.** The competitive fitness gain after evolution relative to the unevolved founder averaged across replicate populations (y axis) is plotted against the competitive fitness of the founder relative to the E strain (x axis). Fitness is measured in % per generation. Dashed black line is  $y = -x$ . Populations above (below) this line are more (less) fit than the control E strain, under the assumption that fitness is transitive. Error bars showing  $\pm 1$  SEM are masked by the symbols (see Table 1 and Figure S2).

### 133 Clonal interference inhibits the ability of natural selection to optimize 134 the TM

135 To determine whether natural selection focuses on restoring defective TMs, we instantiated 10  
136 replicate populations from each of our six founders (60 populations total) and evolved them in  
137 LB for 1,000 generations (Methods) with the bottleneck population size  $N = 5 \times 10^5$  cells. We then  
138 measured the competitive fitness of the evolved populations relative to their respective founders.  
139 Fitness in all but one population increased significantly (t-test  $P < 0.05$  after Benjamini-  
140 Hochberg correction; Figure S2), and the average fitness increase of a population correlated  
141 negatively with the initial fitness of its founder (Figure 1). These results show that even

142 substantial fitness defects caused by reductions in TM performance can be largely compensated  
143 in a short bout of adaptive evolution.

144 The pattern of “declining adaptability” in Figure 1 has been frequently observed in previous  
145 microbial evolution studies [37,39,41,66–70]. It could arise if adaptation is driven either by  
146 mutations only in the TM, by mutations only in other modules, or by mutations in the TM and in  
147 other modules. For evolutionary stalling in the TM to occur, mutations improving the TM must  
148 compete against other types of mutations within the same population. To determine whether both  
149 types of mutations occur in our populations, we conducted whole-population whole-genome  
150 sequencing at multiple timepoints throughout the evolution experiment. This sequencing strategy  
151 allows us to directly observe competition dynamics between mutations in different modules  
152 [32,34,35,40].

153 We selected replicate populations 1 through 6 descended from each founder (a total of 36  
154 populations), sampled each of them at 100-generation intervals (a total of 11 time points per  
155 population) and sequenced the total genomic DNA extracted from these samples. We developed  
156 a bioinformatics pipeline to identify de novo mutations in this data set (Methods). Then, we  
157 called a mutation adaptive if it satisfied two criteria: (i) its frequency changed by more than 20%  
158 in a population; and (ii) it occurred in a “multi-hit” gene, i.e., a gene in which two independent  
159 mutations passed the first criterion. Reliably tracking the frequencies of some types of mutations  
160 (e.g., large copy-number variants) is impossible with our sequencing approach. Therefore, we  
161 augmented our pipeline with the manual identification of copy-number variants which could only  
162 be reliably detected after they reached high frequency in a population (Methods and Figure S3).

163 This procedure yielded 167 new putatively adaptive mutations in 28 multi-hit genes, with the  
164 expected false discovery rate of 13.6%, along with an additional 11 manually-identified  
165 chromosomal amplifications, all of which span the *tufA* locus (Methods and Table S1, Figure  
166 S4). We classified each putatively adaptive mutation as “TM-specific” if the gene where it  
167 occurred is annotated as translation-related (Methods). We classified mutations in all other genes  
168 as “generic”. We found that 38 out of 178 (21%) putatively adaptive mutations in 6 out of 28  
169 multi-hit genes were TM-specific (Table S1). This is significantly more mutations than expected  
170 by chance ( $P < 10^{-4}$ , randomization test) since the 215 genes annotated as translation-related  
171 comprise only 4.0% of the *E. coli* genome. All of the TM-specific mutations occurred in genes  
172 whose only known function is translation-related, such as *rpsF* and *rpsG*, suggesting these  
173 mutations arose in response to the initial defects in the TM. The set of TM-specific mutations is  
174 robust with respect to our filtering criteria (Figure S5).

175 TM-specific mutations occurred in 17 out of 36 sequenced populations. Generic mutations were  
176 also observed in all of these populations (Figure S4). Thus, whenever TM-specific mutations  
177 occurred, generic mutations also occurred, such that the fate of TM-specific mutations must have  
178 depended on the outcome of clonal interference between mutations within and between modules  
179 (Figure 2). As a result of this competition, only 14 out of 27 (52%) TM-specific mutations that  
180 arose (excluding 11 *tufA* amplifications) went to fixation, while the remaining 13 (48%)  
181 succumbed to clonal interference (Figures 2, S4). In at least two of these 13 cases a TM-specific  
182 mutation was outcompeted by expanding clones likely driven by generic mutations: in  
183 population V6, a TM-specific mutation in *fusA* was outcompeted by a clone carrying generic  
184 mutations in *fimD*, *ftsI* and *hslO* (Figure 2); in population P3, a TM-specific mutation in *tufA* was  
185 outcompeted by a clone carrying generic mutations in *amiC* and *trkH* (Figure 2). We conclude  
186 that, while TM-specific beneficial mutations are sufficiently common and their fitness effects are



187 at least sometimes large enough to successfully compete against generic mutations, clonal  
188 interference reduces the power of natural selection to re-optimize the TM.

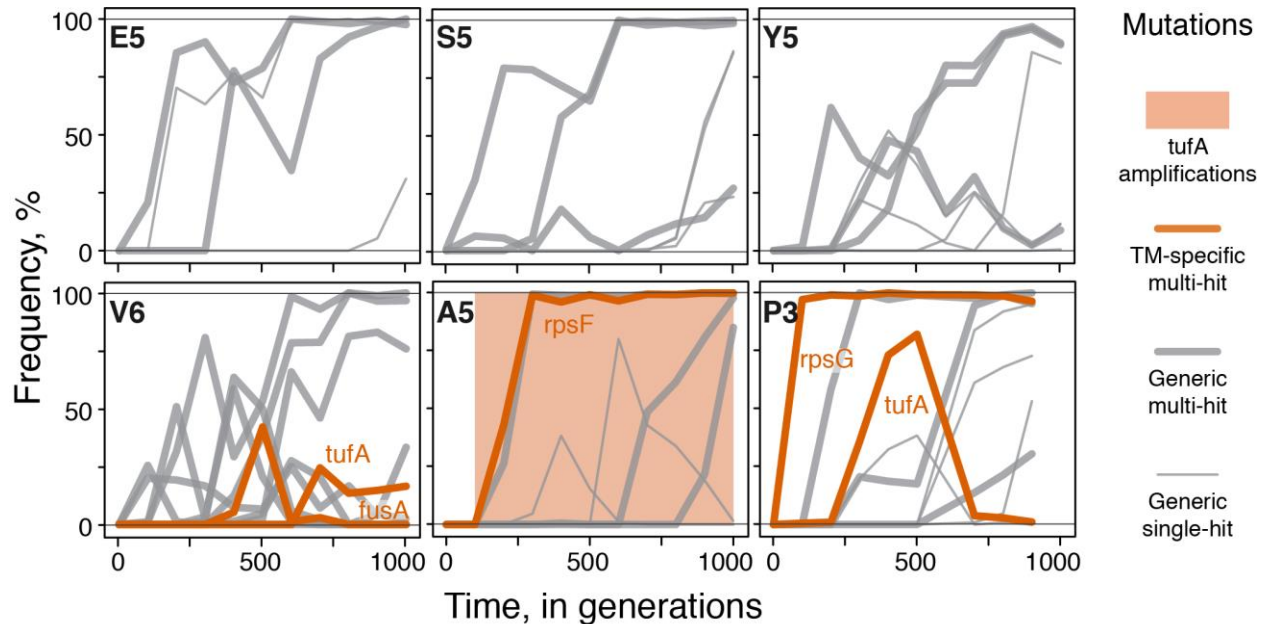

189  
190 **Figure 2. Mutational trajectories in evolving populations.** Mutation frequency trajectories for one  
191 representative replicate population per founder is shown (complete data for all sequenced populations can  
192 be found in Figure S4). Each line represents the frequency trajectory of a single mutation. Shading  
193 indicates the range of timepoints in which a *tufA* amplification was detected.

## 194 Evolution of the TM stalls far from the optimum

195 Competition between adaptive mutations in different modules is necessary but not sufficient for  
196 evolutionary stalling to occur in any one module. Therefore, we sought direct evidence of  
197 evolutionary stalling in the TM. To this end, we examined the distribution of TM-specific  
198 mutations among founders and across evolutionary time. All of the detected TM-specific  
199 mutations occurred in the V, A and P populations whose TMs were initially severely suboptimal;  
200 no TM-specific mutations were detected in the E, S, and Y populations whose TMs were mildly  
201 suboptimal (Figure 3A). Out of the 14 TM-specific mutations that eventually fixed in the V, A  
202 and P populations, 12 (86%) did so in the first selective sweep (this excludes 11 *tufA*  
203 amplifications). In contrast, out of the 16 generic mutations that fixed in these populations, only  
204 7 (44%) did so in the first selective sweep. As a result, an average TM-specific beneficial  
205 mutation reached fixation after only  $300 \pm 52$  generations, compared to  $600 \pm 72$  generations for  
206 an average generic mutation (Figure 3B, S4). Only one (7%) TM-specific beneficial mutation  
207 reached fixation after generation 600, in comparison to 9 (56%) generic beneficial mutations.  
208 Thus, by the end of our evolution experiment, adaptive TM-specific mutations are depleted even  
209 in populations descended from the V, A and P founders.

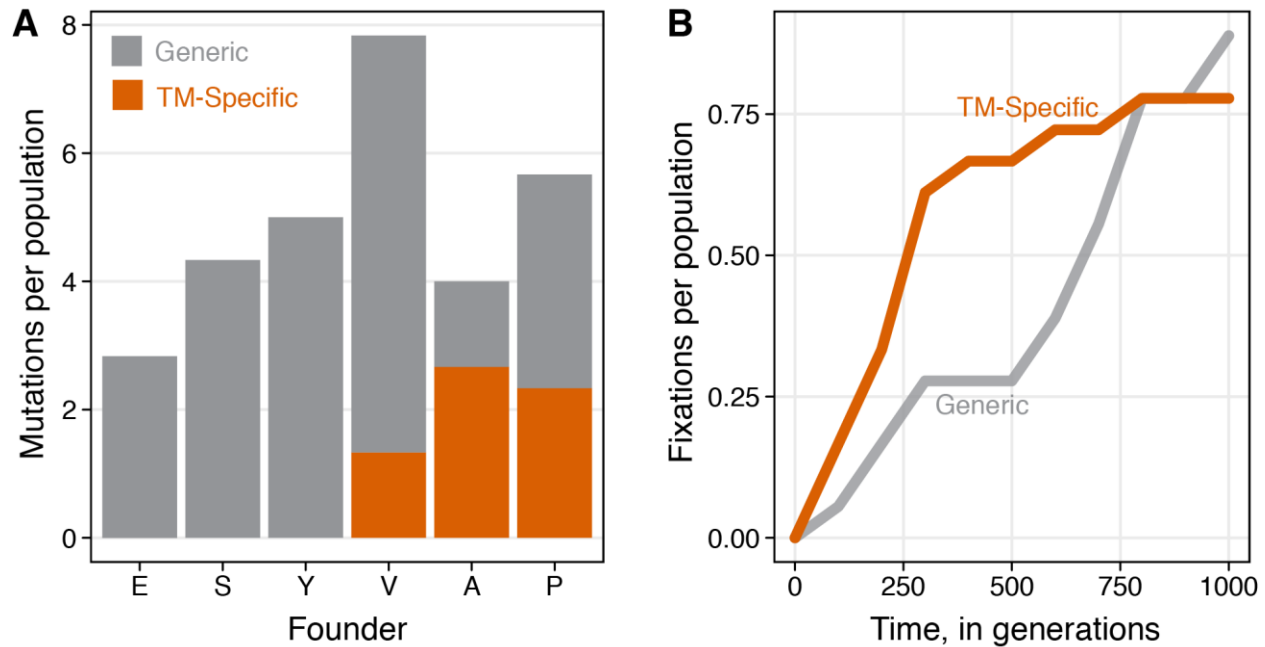

210  
211  
212  
213  
214

**Figure 3. Evidence for stalling in the evolutionary optimization of the TM.** **A.** Number of adaptive TM-specific and generic mutations identified in the six sequenced populations derived from each of the founders. **B.** Cumulative number of fixed TM-specific or generic mutations per population derived from the V, A and P founders.

215 These data demonstrate that evolutionary stalling in the optimization of the TM occurs in our  
216 populations. They also allow us to place bounds on the TM defects which can and cannot be  
217 improved by natural selection prior to the onset of evolutionary stalling. First, consider the  
218 founder Y in which the initial defect in the TM incurs a ~3% fitness cost (Table 1). While Y  
219 populations gained on average 2.4% in fitness during evolution (Figure 1), none of these gains  
220 are attributed to TM-specific mutations. This indicates that TM adaptation is stalled if the initial  
221 TM defect incurs  $\leq 3\%$  fitness cost. Next, consider founder V in which the initial defect in the  
222 TM incurs a ~19% fitness cost (Table 1). We observed 8 TM-specific mutations across all V  
223 populations, including three *tufA* amplifications. At least one of these mutations reached fixation  
224 (Figure S4), suggesting that natural selection can repair defects in the TM that incur  $\geq 19\%$   
225 fitness cost without the onset of evolutionary stalling. We conclude that the focus of natural  
226 selection shifts from optimizing the TM to other cellular modules when the TM incurs a fitness  
227 cost somewhere between 3% and 19%.

228 Another way of arriving at a lower bound for the onset of stalling is to consider the V, A and P  
229 populations. On average, these populations fixed 0.8 TM-specific mutations during evolution,  
230 and remained ~5.3% less fit than the control E strain, assuming fitness is transitive (Figure 1).  
231 Even if we conservatively attribute all these fitness gains to improvements in the TM, by the end  
232 of the experiment, TMs in these populations must still be on average ~5.3% below the optimum.  
233 Yet, by the end of the experiment, fixation of TM mutations had essentially stopped, while  
234 fixation of generic mutations continued unabated (Figures 3B). This suggests that TMs that incur  
235 fitness defects larger than 3% may still be subject to evolutionary stalling.

236 To further corroborate and possibly refine these bounds, we selected two TM-specific mutations  
237 that arose in our populations, genetically reconstructed them in their respective founder strains  
238 and directly measured their fitness benefits. The TM-specific mutation A74G in the *rpsF* gene,



239 which arose in population A5, provides an  $8.2 \pm 1.0\%$  fitness benefit in the A founder. The TM-  
240 specific mutation G331A in gene *rpsG*, which arose in populations P2, P3 and P5, provides a  $6.5$   
241  $\pm 1.2\%$  fitness benefit in the P founder. Such large-effect mutations can never arise in TMs that  
242 incur a less than 6.5% fitness cost, which is further indirect evidence that TM adaptation stalls  
243 when it incurs a fitness cost larger than our conservative 3% bound.

244 If the TM was the only suboptimal module in the cell, theory suggests that its adaptation would  
245 continue until the fitness defect it incurs is  $\frac{n-1}{8N}$ , where  $n$  is the effective number of TM  
246 phenotypes relevant for fitness and  $N$  is the population size [12]. Although  $n$  is unknown, it is  
247 typically thought to be small, even for entire organisms [18,71]. Assuming that  $n \lesssim 10^3$ , which  
248 seems reasonable given that there are roughly 215 translation-related genes in *E. coli* (Methods),  
249 the effective neutrality threshold is  $\lesssim 0.025\%$ . As the TM is not the only module that natural  
250 selection needs to optimize, its adaptation stalls orders of magnitude above the theoretically  
251 predicted effective neutrality threshold.

## 252 Epistasis and historical contingency in TM evolution

253 We observed that natural selection improved all severely suboptimal TMs, but it is unclear  
254 whether different TM defects can be alleviated by a common set of mutations or whether  
255 repairing each TM defect requires its own unique solution. Previous work has shown that genetic  
256 interactions (or “epistasis”) between mutations in the TM have been important in the  
257 evolutionary divergence of TMs along the tree of life [55,72–75]. We reasoned that genetic  
258 interactions might be similarly important in the short bout of evolution observed in our  
259 experiment. Specifically, we asked whether different initial TM variants acquired adaptive  
260 mutations in the same or in different translation-associated genes.

261 We found that 4 out of 7 classes of TM-specific mutations arose in a single founder (Figure 4A).  
262 For example, we detected six independent mutations in the *rpsG* gene, which encodes the  
263 ribosomal protein S7, and all of these mutations occurred in the P founder ( $P < 10^{-4}$ ,  
264 randomization test with Benjamini-Hochberg correction, Methods). Similarly, all four mutations  
265 in the *rpsF* gene, which encodes the ribosomal protein S6, occurred in the A founder ( $P < 10^{-4}$ ,  
266 randomization test with Benjamini-Hochberg correction). To directly measure how the effects of  
267 these mutations vary across genetic backgrounds, we attempted to genetically reconstruct  
268 mutation A74G in the *rpsF* gene and mutation G331A in *rpsG* gene in all six of our founder  
269 strains. We successfully reconstructed both of these mutations in the founder strains in which  
270 they arose and confirmed that they were strongly beneficial, as described above ( $8.2 \pm 1.0\%$  and  
271  $6.5 \pm 1.2\%$  benefit, respectively). In contrast, our multiple reconstruction attempts in all other  
272 founders were unsuccessful (Methods), suggesting that these mutations are strongly deleterious  
273 in all other genetic backgrounds that we tested.

274 These results suggest that genetic interactions between different TM components cause initially  
275 different TM variants to embark on divergent adaptive trajectories and lead to historical  
276 contingency and entrenchment in TM evolution [76–78].

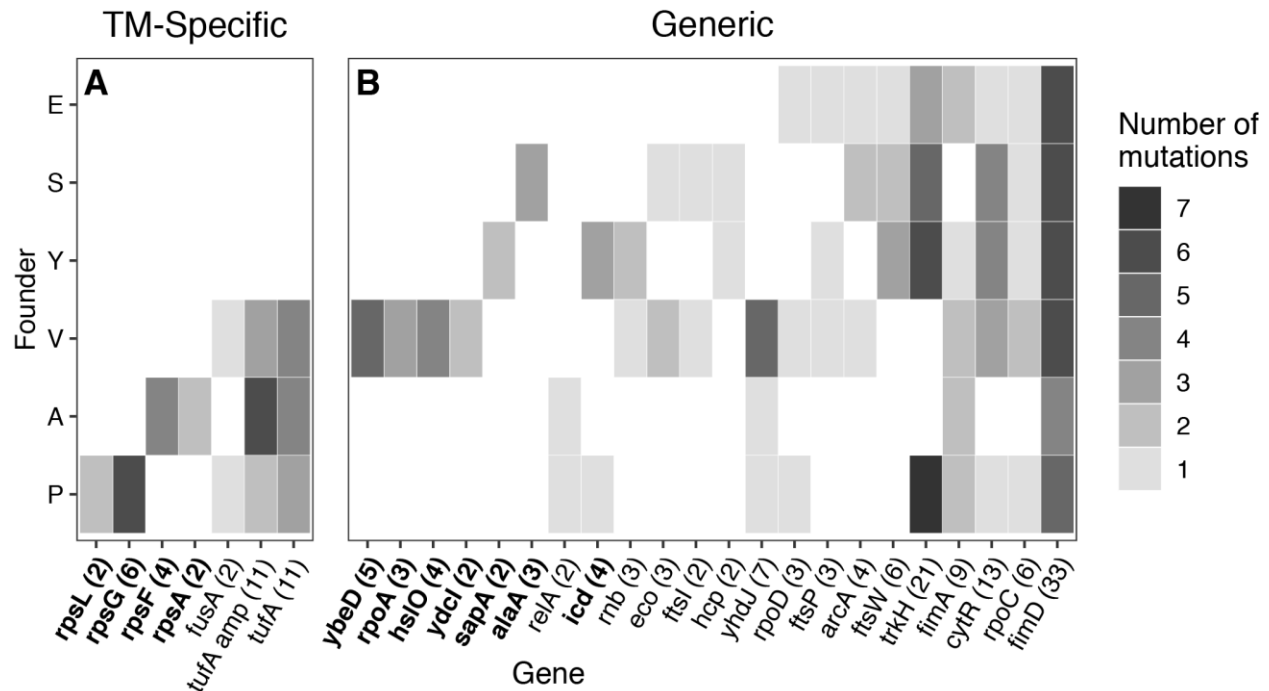

277  
278  
279  
280  
281  
282  
283

**Figure 4. Distribution of putatively adaptive mutations.** Heatmap of all putatively adaptive mutations identified via whole-genome sequencing, grouped by founder and by gene. Amplification of the *tufA* locus are counted separately from other mutations in *tufA*. **A.** Translation-associated genes **B.** All other genes. Genes in bold are those where mutations were detected in significantly fewer founders than expected by chance ( $P < 0.05$ , Benjamini-Hochberg correction, see Methods). Numbers in parentheses indicate the total number of mutations in that gene observed across all sequenced populations.

## 284 Genome-wide adaptive responses to TM perturbations

285 Adaptive evolution of the TM stalls because natural selection acts on multiple cellular modules  
286 in *E. coli*, all of which are encoded on a single non-recombining chromosome. However,  
287 modules are linked not only physically by the encoding DNA but also functionally in that they  
288 all contribute to the fitness of the organism. This functional interdependence implies that  
289 mutations in one module may alter the selection pressure on other modules. For example,  
290 improvements in translation efficiency may increase the selection pressure to improve efficiency  
291 of catabolic reactions, analogously to the “shifting and swaying of selection coefficients” on  
292 enzymes in the same metabolic pathway discussed in the classic work by Hartl et al. [22].  
293 Therefore, in addition to intra-module epistasis demonstrated above we might expect inter-  
294 module epistasis, such that initially different TM variants could precipitate distinct adaptive  
295 responses in the rest of the genome. To test this hypothesis, we examined the distribution of  
296 generic mutations among founder genotypes.

297 We found that generic mutations in 7 out of 22 genes occurred in fewer founders than expected  
298 by chance (Figure 4B, Methods). For example, we detected five independent mutations in the  
299 *ybeD* gene, which encodes a protein with an unknown function, and all these mutations occurred  
300 in the V founder ( $P < 10^{-4}$ , randomization test with Benjamini-Hochberg correction). Similarly,  
301 all three mutations in the *alaA* gene, which encodes a glutamate-pyruvate aminotransferase,  
302 occurred in the A founder ( $P < 10^{-4}$ , randomization test with Benjamini-Hochberg correction).  
303 To corroborate these statistical observations, we reconstructed the T93G mutation in the *ybeD*

304 gene in all six founder strains and directly measured its fitness effects. As expected, this  
305 mutation confers a 5.9% fitness benefit in the V founder. In contrast, it is strongly deleterious in  
306 the P founder and indistinguishable from neutral in the remaining founders (Figure 5). These  
307 results show that at least some genetic perturbations in the TM can have genome-wide  
308 repercussions. They can precipitate bouts of genome-wide adaptive evolution that are contingent  
309 on the initial perturbations in the TM.

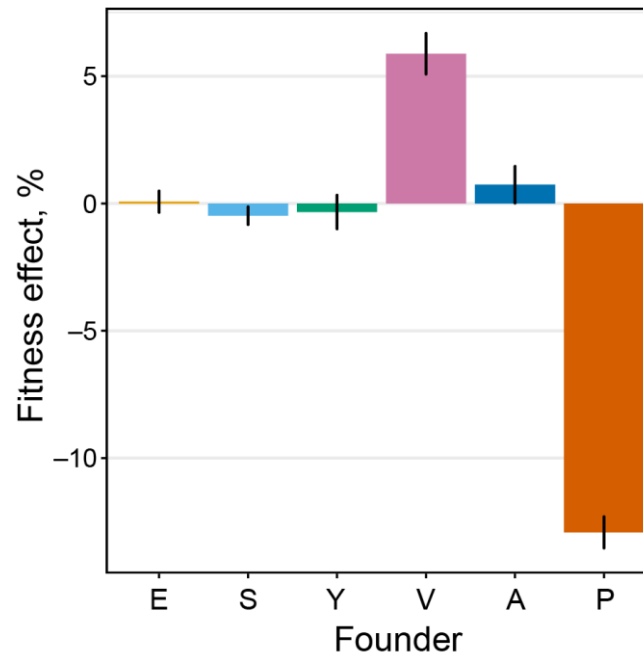

310

311 **Figure 5. Fitness effect of the *ybeD* T193D mutation in different founders.** Fitness effect of the  
312 mutation is measured in a direct competition of each founder with the mutation against the founder without  
313 the mutation. Error bars show the SEM.

314

## 315 Discussion

316 The fitness of an organism depends on the performance of many molecular modules inside cells.  
317 While natural selection favors genotypes with better-performing modules, it is difficult for  
318 evolution to optimize multiple modules simultaneously, particularly when recombination rates  
319 are low and many adaptive mutations in different modules are available. In this regime, natural  
320 selection is expected to focus on optimizing those modules where many mutations provide large  
321 fitness benefits, while the adaptive evolution in other modules stalls. Here we have documented  
322 and characterized the evolutionary stalling of the translation machinery (TM) in *E. coli*.

323 We found that evolutionary optimization of the TM was slowed down by competition with  
324 adaptive mutations in the rest of the genome (Figure 2). The populations whose TMs were  
325 initially mildly sub-optimal (incurring  $\lesssim 3\%$  fitness cost) adapted by acquiring mutations that did  
326 not directly affect the TM. In contrast, populations whose TMs were initially severely sub-  
327 optimal (incurring  $\geq 19\%$  fitness cost) rapidly discovered and fixed TM-specific beneficial  
328 mutations. We conclude that the adaptive evolution of the TM stalls when the TM defect incurs a  
329 fitness cost between 3% and 19%. This is a conservative lower bound on the onset of stalling that  
330 we derived under the assumption that the TM in the control E strain is close to optimal.  
331 However, the E strain itself suffers a  $4.1 \pm 0.1\%$  fitness defect relative to wild-type *E. coli* that  
332 contains the *tufB* gene (Methods). Thus, the adaptive evolution of the TM may actually stall  
333 when the TM defect incurs a fitness cost between 7.1% and 23.1%.

334 Evolutionary stalling in the TM occurs for one of two reasons. First, the rate of TM-specific  
335 beneficial mutations may be too low for these mutations to survive genetic drift when rare.  
336 Alternatively, these mutations occur frequently enough to survive drift but succumb to clonal  
337 interference. Both theoretical and empirical (albeit limited) evidence suggest that small-effect  
338 beneficial mutations are more common than large-effect mutations [16,19,79,80]. The fact that  
339 we observed TM-specific mutations with effects  $\geq 5\%$  indicates that the rate of such mutations is  
340 high. We expect the rate of TM-specific mutations with effects  $< 5\%$  to be even higher. If we  
341 relax the stringency criteria for detecting beneficial mutations, we find one TM-specific mutation  
342 in the gene *rbbA* in the population E5 (Figure S5). This suggests that small-effect TM-specific  
343 beneficial mutations exist and supports the conjecture that adaptation of the TM stalls because of  
344 clonal interference.

345 Our results show that evolutionary stalling limits the ability of natural selection to improve a  
346 module, but this limit is not absolute. As a population accumulates beneficial mutations in other  
347 modules, their supply will be depleted and their fitness effects will likely decrease due to  
348 diminishing returns epistasis [37,66,67,81–83]. These changes will in turn increase the chances  
349 for small-effect mutations in the focal module to survive clonal interference thereby overcoming  
350 evolutionary stalling. While we did not observe resumption of adaptive evolution in the TM in  
351 this experiment, we find some evidence for such a transition in one other module. We detected  
352 11 mutations in multi-hit genes that affect cytokinesis (Methods, Figures S6, S7). Most of these  
353 mutations reached high frequency in the second half of the experiment, suggesting that  
354 adaptation in the cytokinesis module was initially stalled and then resumed.

## 355 General implications for the evolution of modular systems

356 Evolutionary stalling can occur much farther from the optimum than the margin of effective  
357 neutrality, which poses a potentially serious obstacle for evolutionary optimization, in particular  
358 when selection pressures vary over time. To overcome evolutionary stalling in a module, the  
359 supply of large-effect beneficial mutations in other modules must be depleted. However,  
360 variability in selection pressures can replenish this supply, leaving the focal module stalled far  
361 from the optimum. Thus, long periods of time under constant selection pressures might be  
362 required for natural selection to fully optimize even essential modules.

363 Our results imply that it is impossible to fully understand the evolution a cellular module in  
364 isolation from the genome where it is encoded and the population-level processes that govern  
365 evolution. The ability of natural selection to optimize any one module depends on the population  
366 size, the rate of recombination, the supply and the fitness effects of all beneficial mutations in the  
367 genome and on how these quantities change as the population adapts. Further theoretical work  
368 and empirical measurements integrated across multiple levels of biological organization are  
369 required for us to understand adaptive evolution of modular biological systems.

## 370 Implications for the evolution the translation machinery

371 In this work, we identified several TM-specific adaptive mutations, but their biochemical and  
372 physiological effects are at this point unknown. However, the fact that 11 chromosomal  
373 amplifications and 12 noncoding or synonymous events occurred in the *tufA* operon suggests that  
374 some of the TM-specific mutations are beneficial because they adjust EF-Tu abundance in the  
375 cell. This would be consistent with previous evolution experiments [46,84,85]. Directly  
376 measuring the phenotypic effects of the TM-specific mutations described here is an important  
377 avenue for future work.

378 Our results give us a glimpse of the fitness landscape of the TM. This landscape is broadly  
379 consistent with Fisher's geometric model in that the distribution of fitness effects of beneficial  
380 mutations depends on the distance to the performance optimum [10,16,21]. However, Fisher's  
381 model does not inform us how many distinct genotypes encode this optimum and how they are  
382 connected in the genotype space. We observed that evolutionary trajectories originating at  
383 different initial defective TMs gained distinct TM-specific adaptive mutations. This suggests that  
384 the TM performance optimum is encoded by multiple genotypes that either form a single  
385 contiguous neutral network [86] or multiple isolated neutral networks [87]. Moreover, we  
386 observed that most of our populations with initially severely suboptimal TMs were able to  
387 discover TM-specific mutations. This suggests that genotypes that encode high-performing TMs  
388 may be present in the mutational neighborhoods of many genotypes [86,88].

389 How did the translation machinery historically evolve on this fitness landscape? Extant TMs are  
390 thought to be nearly optimal [54], but when and how TMs evolved to this optimal state is  
391 unknown. Our work helps us constrain the plausible evolutionary scenarios. One possibility is  
392 that the TM approached the optimum prior to the last universal common ancestor (LUCA), and  
393 subsequent evolution in TM components along most lineages was driven by conditionally neutral  
394 and mildly deleterious substitutions. Another possibility is that the TM in LUCA was not  
395 optimal, and TMs in different lineages were optimized after LUCA. Our results suggest that  
396 evolving an optimal TM after it was encapsulated in a cell with a physically contiguous genome

397 may have been difficult, especially if other components of the cell also required continuous  
398 adaptation to a changing environment. In other words, the possibility that the TM has been  
399 functionally optimized prior to LUCA appears more likely.

400



## 401 Materials and methods

### 402 Materials, data and code availability

403 All strains and plasmids constructed and used in this work are available per request. Raw  
404 sequencing data were analyzed with the python-based workflow implemented in Ref. [40] and  
405 run on the UCSD TSCC computing cluster via a custom python wrapper script. All analysis and  
406 plots reported in this manuscript have been performed using the R computing environment. The  
407 script, modified reference genomes and the raw data (except for raw sequencing data) used for  
408 analysis can be found at <https://github.com/sandeepvenkataram/EvoStalling>. Raw sequencing  
409 data for this project have been deposited into the NCBI SRA under project PRJNA560969.

### 410 Media and culturing conditions

411 Liquid medium is the Luria-Bertani medium (LB) (per liter, 10 g NaCl, 5 g yeast extract, and 10  
412 g tryptone) and solid medium is LBA (LB with 1.5% agar), unless noted otherwise. All  
413 incubations were done at 37°C, and liquid cultures were shaken at 200 rpm for aeration, unless  
414 noted otherwise. All media components and chemicals were purchased from Sigma, unless noted  
415 otherwise.

### 416 Strains and plasmids

417 All strains in this study were derived from *E. coli* K12 MG1655. Strain genotypes are listed in  
418 Table S2. Complete methods for the construction of the E, S, Y, V, A and P strains, which harbor  
419 a single *tuf* gene variant replacing *tufA* gene, can be found in Ref. [55]. Strains with engineered  
420 *ybeD*, *rpsF* and *rpsG* mutations were constructed using the same method, except the  
421 chromosomal *kanR* marker was not removed (Figure S9). For a full list of primer sequences used  
422 for *ybeD*, *rpsF* and *rpsG* engineering, see Table S2.

423 Plasmids pZS1-TnSL and pZS2-TnSL were used in competition assays to provide Ampicillin  
424 and Kanamycin resistance, respectively. pZS1-TnSL, derived from pUA66 [89], was kindly  
425 provided by Georg Rieckh. pZS2-TnSL was constructed from pZS1-TnSL by replacing the  
426 *ampR* cassette with *kanR*.

### 427 Evolution experiment

428 Experimental evolution was performed by serial dilution at 37°C in LB broth. To start the  
429 evolution experiment, an initial 5 mL overnight culture was inoculated from a single colony from  
430 the frozen stock of each founder strains. 10 replicate populations were started from single  
431 colonies derived from these overnight cultures. The replicates were serially transferred every 24h  
432 ( $\pm 1$ h) as follows: 100  $\mu$ L of saturated culture were transferred into 10 mL saline solution (145  
433 mM NaCl), 50  $\mu$ L of these dilutions were then transferred to 5 mL fresh LB (tubes were  
434 vigorously vortexed prior to pipetting). This resulted in a bottleneck population size of about  
435  $5 \times 10^5$  cells. Freezer stocks (200  $\mu$ L of 20% glycerol + 1 mL saturated culture) were prepared  
436 approximately every 100 generations and stored at  $-80^\circ\text{C}$ .

## 437 Competitive fitness assays

438 To carry out pairwise competition assays, an Ampicillin-resistant and a Kanamycin-resistant  
439 versions of the query and reference strains/populations were generated by transforming these  
440 strains/populations with plasmids pZS1-TnSL and pZS2-TnSL, using standard methods [90].  
441 Two replicate competition assays were performed for each query-reference pair with reciprocal  
442 markers (four assays total per pair), except for allele-replacement mutants (see below). To  
443 validate that the resistance-marker plasmids do not differentially impact fitness in any of the six  
444 founder genetic backgrounds, we carried out three-way competition assays between the KanR-  
445 marked, AmpR-marked and the unmarked versions of the founders (Figure S8). Since the allele-  
446 replacement mutants carry a chromosomal *kanR* marker (see above), they were only competed  
447 against AmpR reference strains.

448 To start a competition assay, a query and a reference cultures were scraped from frozen stocks  
449 and inoculated into 5 mL LB-Amp or LB-Kan media as appropriate. After about 24 hours, the  
450 query and the reference cultures were mixed together in ratio 1:9 and diluted 1:10,000 into 5 mL  
451 fresh LB media. After that, the mixed culture was propagated as in the evolution experiment. To  
452 determine the relative abundances of the query and reference individuals in the mixed culture,  
453 100  $\mu$ l of appropriately diluted cultures were plated on both LB-Amp and LB-Kan plates after  
454 24, 48 and 74 hours of competition. For some competitions, where fitness differences were  
455 particularly large or small, samples from 0 or 96 hours were also obtained. Plates were  
456 photographed after an ~24-hour incubation period (when colonies were easily visible) and  
457 colonies were automatically counted with the OpenCFU software [91]. In each competition, we  
458 estimated the fitness of the query strain relative to the reference strain by linear regression of the  
459 natural logarithm of the ratio of the query to reference strain dilution-adjusted colony counts  
460 against time. Variance was also estimated from these regressions. Replicate measurements were  
461 combined into the final estimate using the inverse variance weighting method.

462 Competitions between two reciprocally marked versions of the same strain represent a special  
463 case. If the two marker-carrying plasmids impose exactly the same fitness cost, our competition  
464 assay between two reciprocally marked versions of the same strain is fully symmetric, which  
465 implies that in expectation it must yield a fitness value of exactly zero. Any estimate of fitness  
466 from a finite number of measurements even in such idealized fully symmetric case will not zero.  
467 However, such deviations from zero would reflect only measurement noise rather than any  
468 biologically meaningful fitness difference. In reality, the two marker-carrying plasmids may  
469 impose slightly different fitness costs, but because the difference in the cost is detectable (see  
470 above), we still interpret deviations from zero in our fitness estimates as noise. Therefore, in  
471 competitions of reciprocally marked versions of the same strain, we set our fitness estimate to  
472 zero and use the four fitness values obtained from the replicate assays to estimate the noise  
473 variance as the average of the squared fitness value.

## 474 Growth rate assays

475 Strains were inoculated from frozen stock into 5 mL LB media in 15 mL culture tubes and grown  
476 overnight. After 24 hours of growth, the cultures were diluted 1:100 into fresh 5 mL of media  
477 and grown for 4 hours. They were diluted again 1:100 into 200  $\mu$ l of LB in flat-bottom Costar 96  
478 well microplates (VWR Catalog #25381-056) and grown in a Molecular Devices SpectraMax i3x

479 Multi-mode microplate reader at 37°C with shaking for 24 hours with absorbance measurements  
480 at 600 nm every 15 minutes. Three replicate growth measurements were conducted for each  
481 strain. Optical density data were first ln-transformed. A linear regression model was fit to all sets  
482 of 5 consecutive data points where OD was below 0.1. Growth rate for the culture was estimated  
483 as the maximal slope across all of these 5-point regressions. The mean growth rate and standard  
484 error of the mean were calculated from replicate measurements.

## 485 Genome sequencing

486 Whole-genome sequencing was conducted for population samples of 6 replicate populations for  
487 each of the 6 founders (36 total populations). Each population was sequenced at 11 timepoints,  
488 every 100 generations beginning at generation 0. Four lanes of 100 bp paired end sequencing  
489 was conducted at the UCSD IGM Genomics center on an Illumina HiSeq 4000 machine. The  
490 average per-base-pair coverage across all samples was 131x. Samples E1\_t600, E2\_t500,  
491 Y3\_t600, P3\_t600, P2\_t800, P2\_t1000 and A1\_t700 yielded data inconsistent with the rest of the  
492 allele frequency trajectories from the same population, likely due to mislabelling during sample  
493 preparation. These samples were subsequently removed from our analysis.

## 494 DNA extraction and library preparation

495 To minimize competitive growth during handling, 100 µl of a 1:10,000 dilution of frozen stock  
496 from each sample was plated on LB agar plates and incubated at 37°C overnight. The entire plate  
497 of colonies was then scraped and used for genomic DNA extraction. DNA extractions were  
498 conducted using the Geneaid Presto mini gDNA Bacteria Kit (#GBB300) following the  
499 manufacturer's protocol. Library preparation was conducted using a modified Illumina Nextera  
500 protocol as described in [92].

## 501 Validation of variants with Sanger sequencing

502 43/45 variants, particularly those in loci previously annotated to be involved with translation,  
503 were validated using Sanger sequencing. Briefly, populations and timepoints containing the  
504 variant at substantial frequency were identified, and clones isolated for genomic DNA extraction,  
505 PCR and Sanger Sequencing using standard protocols. The primers used for this validation are  
506 detailed in Table S3. The two mutations that failed to validate were expected to be at relatively  
507 low frequency in their populations (17% and 38%), so additional clone sampling may be  
508 required to validate these events.

## 509 Analysis of sequencing data

### 510 Variant calling

511 Sequenced samples were mapped to the MG1655 reference genome (NCBI accession U00096.3)  
512 and variants were called using a custom breseq-based pipeline described in Supplementary text  
513 section 4 of Ref. [40] and kindly provided to us by Dr. Benjamin Good. Briefly, this method  
514 leverages the fact that each population was sampled multiple times across the evolution

515 experiment to increase our ability to distinguish real low-frequency variants from sequencing  
516 errors and other sources of noise.

517 The reference genome was modified with the appropriate *tufA* sequence for each genetic  
518 background used in the evolution experiment along with the removal of the *tufB* sequence, and  
519 annotation coordinates were lifted over to be consistent with the original MG1655 reference  
520 sequence using custom scripts. The modified reference genomes and annotation files are  
521 included in the github repository. The variants reported in Table S1 have been lifted back to be  
522 compatible with the original MG1655 reference genome.

## 523 Annotation

524 Variant annotation was conducted using the software package ANNOVAR[93]. Coding variants  
525 were established as normal, while noncoding variants were annotated as being associated with  
526 the closest gene (in either strand, in either direction) in the genome, as long as it was less than 1  
527 kb away. As ANNOVAR is not set up to work with *E. coli* by default, the *E. coli* MG1655  
528 nucleotide annotation was downloaded in GFF3 form from NCBI Genbank (U00096.3).  
529 Cufflinks[94] gffread tool was used to convert this file to GTF, which was then converted to  
530 GenePred by using the UCSC Genome Browser gtfToGenePred tool. The final annotation file  
531 was generated using the ANNOVAR retrieve\_seq\_from\_fasta.pl script. The annotation file was  
532 lifted over to be compatible with each reference sequence.

533 Copy number variants were called manually using genome-wide coverage plots generated using  
534 samtools[95] “view” command and the R computing environment. As these variants have their  
535 frequency confounded with their copy number, only their presence/absence was noted for  
536 downstream analysis.

## 537 Filtering

538 We considered single nucleotide polymorphisms, short insertion/deletion and the manually  
539 identified copy number variants for further analysis. Chromosomal aberrations were ignored  
540 because breseq appears to have a high false positive rate (average of 27 “junction” calls per  
541 population across all timepoints). Variants were filtered in three successive steps. (1) Variants  
542 not identified in multiple consecutive time points were removed. (2) Variants supported by less  
543 than 10 reads across all timepoints in a given population were removed. (3) Since we observed  
544 fixation events in every population and since there should be no DNA exchange, all truly  
545 segregating variants present in a population at generation 100 must either be fixed or lost in  
546 generations 900 and 1000. Thus, we removed variants that failed to do so.

547 Variants that were present at an average frequency  $\geq 95\%$  at generation 100 across at least 18  
548 populations were denoted as ancestral mutations that differentiate the founder from the reference  
549 genome ( $n = 10$ ). Variants that were not ancestral but present at  $\geq 95\%$  on average across all  
550 populations derived from one founder were denoted as founder mutations ( $n = 11$ ). These  
551 mutations were likely introduced as a byproduct of the strain engineering process. Multiallelic  
552 variants (two or more derived alleles present in a single population at the same site) were also  
553 removed as likely mapping artifacts. Finally, variants that were present at generation 100 in 11+  
554 populations (of 36 total sequenced populations) are either mapping artifacts or pre-existing  
555 variants and were not considered further ( $n = 169$ , including the 10 ancestral mutations identified  
556 earlier).

## 557 Identification of adaptive mutations

558 The putatively adaptive mutations were identified as follows. We first identified mutations that  
559 reached at least 10% frequency, were present in at least two consecutive time points and whose  
560 frequency changed by at least 20% throughout the evolution. We then merged together such  
561 mutations within 10 bp of each other as likely being derived from a single event. This resulted in  
562 a set of candidate adaptive mutations. To identify likely adaptive mutations in this candidate set,  
563 we considered only mutations in “multihit” genes, i.e., genes with 2 or more candidate adaptive  
564 mutations.

## 565 Identification of modules in the genome

566 The 215 genes annotated as being associated with translation were identified using the Gene  
567 Ontology database at <http://geneontology.org/> by searching for all *E. coli* K12 genes that were  
568 identified in a search for “translation OR ribosom”. Similarly, the 45 genes associated with  
569 cytokinesis were identified using a search for “cytokinesis”.

## 570 Statistical analyses

571 The expected number of mutations in multihit genes was calculated via multinomial sampling.  
572 Mutations were randomly redistributed across all genes in the *E. coli* genome controlling for  
573 variation in gene length. The average of 10,000 such randomizations was used to calculate an  
574 empirical FDR. A similar procedure was used to estimate the probability of observed as many or  
575 more TM-specific mutations by chance as we actually observed in this study.

576 To test whether mutations in the 7 TM-specific multi-hit loci were distributed uniformly across  
577 the six founders we first estimated the entropy of the distribution of mutations across founders  
578 for each gene. Mutations in that gene were then randomly redistributed across six founders  
579 10,000 times, weighted by the total number of TM-specific mutations observed in each founder.  
580 An empirical *P*-value was calculated as the fraction trials with smaller than observed entropy  
581 value. These *P*-values were then corrected for multiple testing across the 7 TM-specific loci  
582 using the Benjamini-Hochberg procedure. We used the same procedure to test for significant  
583 deviations in the distributions of generic mutations across founders.

584

## 585 Acknowledgements

586 We thank members of the Kryazhimskiy and Kaçar groups, Joanna Masel, Ryan Gutenkunst,  
587 Suparna Sanyal, Grant Kinsler, Justin Meyer, and Lin Chao for input and feedback. We thank  
588 Alex Pleša, Divjot Kaur, Emily Peñaherrera, Kevin Longoria and Lesly Villarejo for laboratory  
589 assistance. We thank Huanyu Kuo for the analysis of growth-curve data. We thank Eva  
590 Garmendia for providing the recombineering plasmids and Georg Rieckh for providing the  
591 resistance marker plasmids. We thank Benjamin Good for help with his genome sequencing data  
592 analysis pipeline. We thank Kristen Jepsen and the UCSD Institute for Genomic Medicine for  
593 sequencing services and the San Diego Supercomputing Center for providing the computational  
594 environment. BK acknowledges the support by the John Templeton Foundation (#58562 and  
595 #61239); the NASA Exobiology and Evolutionary Biology Program (#H006201406) and the  
596 NASA Astrobiology Institute (#NNA17BB05A). SK acknowledges the support by BWF Career  
597 Award at the Scientific Interface (#1010719.01), the Alfred P. Sloan Foundation (#FG-2017-  
598 9227) and the Hellman Foundation.



## 599 References

- 600 1. Simon HA. The Architecture of Complexity. *Proc Am Phil Soc.* 1962;106: 467–482.
- 601 2. Valentine JW, May CL. Hierarchies in Biology and Paleontology. *Paleobiology.* 1996;22: 23–33.
- 602 3. McShea DW. The hierarchical structure of organisms: a scale and documentation of a trend in the  
603 maximum. *Paleobiology.* 2001;27: 405–423.
- 604 4. Ravasz E, Somera AL, Mongru DA, Oltvai ZN, Barabási AL. Hierarchical organization of  
605 modularity in metabolic networks. *Science.* 2002;297: 1551–1555.
- 606 5. Mengistu H, Huizinga J, Mouret J-B, Clune J. The Evolutionary Origins of Hierarchy. *PLoS Comput*  
607 *Biol.* 2016;12: e1004829.
- 608 6. Hartwell LH, Hopfield JJ, Leibler S, Murray AW. From molecular to modular cell biology. *Nature.*  
609 1999;402: C47–52.
- 610 7. Wagner GP, Pavlicev M, Cheverud JM. The road to modularity. *Nat Rev Genet.* 2007;8: 921–931.
- 611 8. Woese C. Molecular mechanics of translation: a reciprocating ratchet mechanism. *Nature.* 1970;226:  
612 817–820.
- 613 9. Frank J. The ribosome--a macromolecular machine par excellence. *Chem Biol.* 2000;7: R133–41.
- 614 10. Fisher R. The genetical theory of natural selection. Oxford University Press; 1930.
- 615 11. Kacser H, Burns JA. The molecular basis of dominance. *Genetics.* 1981;97: 639–666.
- 616 12. Hartl DL, Taubes CH. Towards a theory of evolutionary adaptation. *Genetica.* 1998;102-103: 525–  
617 533.
- 618 13. Orr HA. The population genetics of adaptation: the distribution of factors fixed during adaptive  
619 evolution. *Evolution.* 1998;52: 935–949.
- 620 14. Welch JJ, Waxman D. Modularity and the cost of complexity. *Evolution.* 2003;57: 1723–1734.
- 621 15. Orr HA. The genetic theory of adaptation: a brief history. *Nat Rev Genet.* 2005;6: 119–127.
- 622 16. Orr HA. The distribution of fitness effects among beneficial mutations in Fisher’s geometric model  
623 of adaptation. *J Theor Biol.* 2006;238: 279–285.
- 624 17. Waxman D. Fisher’s geometrical model of evolutionary adaptation—Beyond spherical geometry. *J*  
625 *Theor Biol.* 2006;241: 887–895.
- 626 18. Martin G, Lenormand T. A general multivariate extension of Fisher’s geometrical model and the  
627 distribution of mutation fitness effects across species. *Evolution.* 2006;60: 893–907.
- 628 19. Martin G, Lenormand T. The distribution of beneficial and fixed mutation fitness effects close to an  
629 optimum. *Genetics.* 2008;179: 907–916.
- 630 20. Gordo I, Campos PRA. Evolution of clonal populations approaching a fitness peak. *Biol Lett.*

- 631           2013;9: 20120239.
- 632   21. Tenaillon O. The Utility of Fisher's Geometric Model in Evolutionary Genetics. *Annu Rev Ecol*  
633       *Evol Syst.* 2014;45: 179–201.
- 634   22. Hartl DL, Dykhuizen DE, Dean AM. Limits of adaptation: the evolution of selective neutrality.  
635       *Genetics.* 1985;111: 655–674.
- 636   23. Lynch M. Evolutionary layering and the limits to cellular perfection. *Proc Natl Acad Sci U S A.*  
637       2012. Available: <https://www.pnas.org/content/109/46/18851.short>
- 638   24. Nourmohammad A, Schiffels S, Lässig M. Evolution of molecular phenotypes under stabilizing  
639       selection. *J Stat Mech: Theory Exp.* 2013;2013: P01012.
- 640   25. Barton NH. Linkage and the limits to natural selection. *Genetics.* 1995;140: 821–841.
- 641   26. Gerrish PJ, Lenski RE. The fate of competing beneficial mutations in an asexual population.  
642       *Genetica.* 1998;102-103: 127–144.
- 643   27. Desai MM, Fisher DS. Beneficial mutation–selection balance and the effect of linkage on positive  
644       selection. *Genetics.* 2007;176: 1759–1798.
- 645   28. Neher RA, Shraiman BI. Competition between recombination and epistasis can cause a transition  
646       from allele to genotype selection. *Proc Natl Acad Sci U S A.* 2009;106: 6866–6871.
- 647   29. Good BH, Rouzine IM, Balick DJ, Hallatschek O, Desai MM. Distribution of fixed beneficial  
648       mutations and the rate of adaptation in asexual populations. *Proc Natl Acad Sci U S A.* 2012;109:  
649       4950–4955.
- 650   30. Schiffels S, Szöllosi GJ, Mustonen V, Lässig M. Emergent neutrality in adaptive asexual evolution.  
651       *Genetics.* 2011;189: 1361–1375.
- 652   31. Lang GI, Botstein D, Desai MM. Genetic variation and the fate of beneficial mutations in asexual  
653       populations. *Genetics.* 2011;188: 647–661.
- 654   32. Lang GI, Rice DP, Hickman MJ, Sodergren E, Weinstock GM, Botstein D, et al. Pervasive genetic  
655       hitchhiking and clonal interference in forty evolving yeast populations. *Nature.* 2013;500: 571–574.
- 656   33. Kao KC, Sherlock G. Molecular characterization of clonal interference during adaptive evolution in  
657       asexual populations of *Saccharomyces cerevisiae*. *Nat Genet.* 2008;40: 1499–1504.
- 658   34. Kvitek DJ, Sherlock G. Whole genome, whole population sequencing reveals that loss of signaling  
659       networks is the major adaptive strategy in a constant environment. *PLoS Genet.* 2013;9: e1003972.
- 660   35. Herron MD, Doebeli M. Parallel evolutionary dynamics of adaptive diversification in *Escherichia*  
661       *coli*. *PLoS Biol.* 2013;11: e1001490.
- 662   36. Tenaillon O, Rodríguez-Verdugo A, Gaut RL, McDonald P, Bennett AF, Long AD, et al. The  
663       molecular diversity of adaptive convergence. *Science.* 2012;335: 457–461.
- 664   37. Kryazhimskiy S, Rice DP, Jerison ER, Desai MM. Global epistasis makes adaptation predictable  
665       despite sequence-level stochasticity. *Science.* 2014;344: 1519–1522.

- 666 38. Szamecz B, Boross G, Kalapis D, Kovács K, Fekete G, Farkas Z, et al. The genomic landscape of  
667 compensatory evolution. *PLoS Biol.* 2014;12: e1001935.
- 668 39. Jerison ER, Kryazhimskiy S, Mitchell JK, Bloom JS, Kruglyak L, Desai MM. Genetic variation in  
669 adaptability and pleiotropy in budding yeast. *Elife.* 2017;6.
- 670 40. Good BH, McDonald MJ, Barrick JE, Lenski RE, Desai MM. The dynamics of molecular evolution  
671 over 60,000 generations. *Nature.* 2017;551: 45–50.
- 672 41. Rojas Echenique JI, Kryazhimskiy S, Nguyen Ba AN, Desai MM. Modular epistasis and the  
673 compensatory evolution of gene deletion mutants. *PLoS Genet.* 2019;15: e1007958.
- 674 42. Gresham D, Desai MM, Tucker CM, Jenq HT, Pai DA, Ward A, et al. The repertoire and dynamics  
675 of evolutionary adaptations to controlled nutrient-limited environments in yeast. *PLoS Genet.*  
676 2008;4: e1000303.
- 677 43. Hong J, Gresham D. Molecular specificity, convergence and constraint shape adaptive evolution in  
678 nutrient-poor environments. *PLoS Genet.* 2014;10: e1004041.
- 679 44. Payen C, Di Rienzi SC, Ong GT, Pogachar JL, Sanchez JC, Sunshine AB, et al. The dynamics of  
680 diverse segmental amplifications in populations of *Saccharomyces cerevisiae* adapting to strong  
681 selection. *G3.* 2014;4: 399–409.
- 682 45. Couñago R, Chen S, Shamoo Y. In vivo molecular evolution reveals biophysical origins of  
683 organismal fitness. *Mol Cell.* 2006;22: 441–449.
- 684 46. Chou H-H, Delaney NF, Draghi JA, Marx CJ. Mapping the fitness landscape of gene expression  
685 uncovers the cause of antagonism and sign epistasis between adaptive mutations. *PLoS Genet.*  
686 2014;10: e1004149.
- 687 47. Michener JK, Neves AAC, Vuilleumier S, Bringel F, Marx CJ. Effective use of a horizontally-  
688 transferred pathway for dichloromethane catabolism requires post-transfer refinement. *Elife.*  
689 2014;3: e04279.
- 690 48. Venkataram S, Dunn B, Li Y, Agarwala A, Chang J, Ebel ER, et al. Development of a  
691 Comprehensive Genotype-to-Fitness Map of Adaptation-Driving Mutations in Yeast. *Cell.*  
692 2016;166: 1585–1596.e22.
- 693 49. Rodrigues JV, Shakhnovich EI. Adaptation to mutational inactivation of an essential gene converges  
694 to an accessible suboptimal fitness peak. *Elife.* 2019;8. doi:10.7554/eLife.50509
- 695 50. Laan L, Koschwanez JH, Murray AW. Evolutionary adaptation after crippling cell polarization  
696 follows reproducible trajectories. *Elife.* 2015;4. doi:10.7554/eLife.09638
- 697 51. Ramakrishnan V. Ribosome structure and the mechanism of translation. *Cell.* 2002;108: 557–572.
- 698 52. Williamson JR. The ribosome at atomic resolution. *Cell.* 2009;139: 1041–1043.
- 699 53. Melnikov S, Ben-Shem A, Garreau de Loubresse N, Jenner L, Yusupova G, Yusupov M. One core,  
700 two shells: bacterial and eukaryotic ribosomes. *Nat Struct Mol Biol.* 2012;19: 560–567.
- 701 54. Savir Y, Tlusty T. The ribosome as an optimal decoder: a lesson in molecular recognition. *Cell.*  
702 2013;153: 471–479.

- 703 55. Kaçar B, Garmendia E, Tuncbag N, Andersson DI, Hughes D. Functional Constraints on Replacing  
704 an Essential Gene with Its Ancient and Modern Homologs. *MBio*. 2017;8. doi:10.1128/mBio.01276-  
705 17
- 706 56. Miller DL, Weissbach H. Factors involved in the transfer of aminoacyl-tRNA to the ribosome. In:  
707 Petska S, Weissbach H, editors. *Molecular mechanisms of protein biosynthesis*. Academic Press,  
708 London; 1977. pp. 323–373.
- 709 57. Nilsson J, Nissen P. Elongation factors on the ribosome. *Curr Opin Struct Biol*. 2005;15: 349–354.
- 710 58. Scott M, Gunderson CW, Mateescu EM, Zhang Z, Hwa T. Interdependence of Cell Growth and  
711 Gene Expression: Origins and Consequences. *Science*. 2010;330: 1099–1102.
- 712 59. Tubulekas I, Hughes D. Suppression of rpsL phenotypes by tuf mutations reveals a unique  
713 relationship between translation elongation and growth rate. *Mol Microbiol*. 1993;7: 275–284.
- 714 60. Schnell R, Abdulkarim F, Kálmán M, Isaksson LA. Functional EF-Tu with large C-terminal  
715 extensions in an *E. coli* strain with a precise deletion of both chromosomal tuf genes. *FEBS Lett*.  
716 2003;538: 139–144.
- 717 61. Lenski RE, Mongold JA, Sniegowski PD, Travisano M, Vasi F, Gerrish PJ, et al. Evolution of  
718 competitive fitness in experimental populations of *E. coli*: what makes one genotype a better  
719 competitor than another? *Antonie Van Leeuwenhoek*. 1998;73: 35–47.
- 720 62. Li Y, Venkataram S, Agarwala A, Dunn B, Petrov DA, Sherlock G, et al. Hidden Complexity of  
721 Yeast Adaptation under Simple Evolutionary Conditions. *Curr Biol*. 2018;28: 515–525.e6.
- 722 63. Manhart M, Adkar BV, Shakhnovich EI. Trade-offs between microbial growth phases lead to  
723 frequency-dependent and non-transitive selection. *Proc Biol Sci*. 2018;285.
- 724 64. Vasi F, Travisano M, Lenski RE. Long-Term Experimental Evolution in *Escherichia coli*. II.  
725 Changes in Life-History Traits During Adaptation to a Seasonal Environment. *Am Nat*. 1994;144:  
726 432–456.
- 727 65. Utnes ALG, Sørum V, Hülter N, Primicerio R, Hegstad J, Kloos J, et al. Growth phase-specific  
728 evolutionary benefits of natural transformation in *Acinetobacter baylyi*. *ISME J*. 2015;9: 2221–2231.
- 729 66. Khan AI, Dinh DM, Schneider D, Lenski RE, Cooper TF. Negative epistasis between beneficial  
730 mutations in an evolving bacterial population. *Science*. 2011;332: 1193–1196.
- 731 67. Wünsche A, Dinh DM, Satterwhite RS, Arenas CD, Stoebel DM, Cooper TF. Diminishing-returns  
732 epistasis decreases adaptability along an evolutionary trajectory. *Nat Ecol Evol*. 2017;1: 61.
- 733 68. Wisner MJ, Ribbeck N, Lenski RE. Long-term dynamics of adaptation in asexual populations. *Science*.  
734 2013;342: 1364–1367.
- 735 69. Schoustra SE, Bataillon T, Gifford DR, Kassen R. The properties of adaptive walks in evolving  
736 populations of fungus. *PLoS Biol*. 2009;7: e1000250.
- 737 70. Couce A, Tenaillon OA. The rule of declining adaptability in microbial evolution experiments. *Front*  
738 *Genet*. 2015;6: 99.
- 739 71. Tenaillon O, Silander OK, Uzan J-P, Chao L. Quantifying organismal complexity using a population

- 740 genetic approach. PLoS One. 2007;2: e217.
- 741 72. Asai T, Zaporozets D, Squires C, Squires CL. An Escherichia coli strain with all chromosomal rRNA  
742 operons inactivated: complete exchange of rRNA genes between bacteria. Proc. Natl. Acad. Sci. U.  
743 S. A. 1999. pp. 1971–1976.
- 744 73. Dutheil JY, Jossinet F, Westhof E. Base pairing constraints drive structural epistasis in ribosomal  
745 RNA sequences. Mol Biol Evol. 2010;27: 1868–1876.
- 746 74. Barreto FS, Burton RS. Evidence for compensatory evolution of ribosomal proteins in response to  
747 rapid divergence of mitochondrial rRNA. Mol Biol Evol. 2013;30: 310–314.
- 748 75. Sloan DB, Triant DA, Wu M, Taylor DR. Cytonuclear interactions and relaxed selection accelerate  
749 sequence evolution in organelle ribosomes. Mol Biol Evol. 2014;31: 673–682.
- 750 76. Shah P, McCandlish DM, Plotkin JB. Contingency and entrenchment in protein evolution under  
751 purifying selection. Proc Natl Acad Sci U S A. 2015;112: E3226–35.
- 752 77. Starr TN, Flynn JM, Mishra P, Bolon DNA, Thornton JW. Pervasive contingency and entrenchment  
753 in a billion years of Hsp90 evolution. Proc Natl Acad Sci U S A. 2018;115: 4453–4458.
- 754 78. Blount ZD, Lenski RE, Losos JB. Contingency and determinism in evolution: Replaying life’s tape.  
755 Science. 2018;362.
- 756 79. Orr HA. The distribution of fitness effects among beneficial mutations. Genetics. 2003;163: 1519–  
757 1526.
- 758 80. Levy SF, Blundell JR, Venkataram S, Petrov DA, Fisher DS, Sherlock G. Quantitative evolutionary  
759 dynamics using high-resolution lineage tracking. Nature. 2015;519: 181.
- 760 81. Chou H-H, Chiu H-C, Delaney NF, Segrè D, Marx CJ. Diminishing returns epistasis among  
761 beneficial mutations decelerates adaptation. Science. 2011;332: 1190–1192.
- 762 82. MacLean RC, Perron GG, Gardner A. Diminishing returns from beneficial mutations and pervasive  
763 epistasis shape the fitness landscape for rifampicin resistance in Pseudomonas aeruginosa. Genetics.  
764 2010;186: 1345–1354.
- 765 83. Wei X, Zhang J. Patterns and mechanisms of diminishing returns from beneficial mutations. Mol  
766 Biol Evol. 2019.
- 767 84. Lind PA, Tobin C, Berg OG, Kurland CG, Andersson DI. Compensatory gene amplification restores  
768 fitness after inter-species gene replacements. Mol Microbiol. 2010;75: 1078–1089.
- 769 85. Kacar B, Ge X, Sanyal S, Gaucher EA. Experimental Evolution of Escherichia coli Harboring an  
770 Ancient Translation Protein. J Mol Evol. 2017;84: 69–84.
- 771 86. Wagner A. Neutralism and selectionism: a network-based reconciliation. Nat Rev Genet. 2008;9:  
772 965–974.
- 773 87. Schaper S, Johnston IG, Louis AA. Epistasis can lead to fragmented neutral spaces and contingency  
774 in evolution. Proc Biol Sci. 2012;279: 1777–1783.
- 775 88. Newman MEJ, Engelhardt R. Effects of selective neutrality on the evolution of molecular species.

- 776 Proc Roy Soc B: Biological Sciences. 1998;265: 1333–1338.
- 777 89. Zaslaver A, Mayo AE, Rosenberg R, Bashkin P, Sberro H, Tsalyuk M, et al. Just-in-time  
778 transcription program in metabolic pathways. *Nat Genet.* 2004;36: 486–491.
- 779 90. Chung CT, Niemela SL, Miller RH. One-step preparation of competent *Escherichia coli*:  
780 transformation and storage of bacterial cells in the same solution. *Proc Natl Acad Sci U S A.*  
781 1989;86: 2172–2175.
- 782 91. Geissmann Q. OpenCFU, a new free and open-source software to count cell colonies and other  
783 circular objects. *PLoS One.* 2013;8: e54072.
- 784 92. Baym M, Kryazhimskiy S, Lieberman TD, Chung H, Desai MM, Kishony R. Inexpensive  
785 multiplexed library preparation for megabase-sized genomes. *PLoS One.* 2015;10: e0128036.
- 786 93. Wang K, Li M, Hakonarson H. ANNOVAR: functional annotation of genetic variants from high-  
787 throughput sequencing data. *Nucleic Acids Res.* 2010;38: e164.
- 788 94. Trapnell C, Roberts A, Goff L, Pertea G, Kim D, Kelley DR, et al. Differential gene and transcript  
789 expression analysis of RNA-seq experiments with TopHat and Cufflinks. *Nat Protoc.* 2012;7: 562–  
790 578.
- 791 95. Li H, Handsaker B, Wysoker A, Fennell T, Ruan J, Homer N, et al. The Sequence Alignment/Map  
792 format and SAMtools. *Bioinformatics.* 2009;25: 2078–2079.
- 793
