# 1 The Onset of Evolutionary Stalling and the 2 Limit on the Power of Natural Selection to 3 Improve a Cellular Module

4 Sandeep Venkataram<sup>1</sup>, Ross Monasky<sup>2</sup>, Shohreh H Sikaroodi<sup>1,3</sup>, Sergey  
5 Kryazhimskiy<sup>1,\*†</sup>, Betül Kaçar<sup>2,\*†</sup>

6 <sup>1</sup>Division of Biological Sciences, University of California San Diego, La Jolla, CA 92093;

7 <sup>2</sup>Department of Molecular and Cellular Biology, University of Arizona, Tucson, AZ 85721;

8 <sup>3</sup>Current address: Molecular engineering group, Fate Therapeutics Inc.

9 \*Equal contribution

10 †Corresponding authors: [betul@arizona.edu](mailto:betul@arizona.edu), [skryazhi@ucsd.edu](mailto:skryazhi@ucsd.edu)

## 11 Abstract

12 Cells consist of molecular modules which perform vital biological functions. Modules are key  
13 units of adaptive evolution because organismal fitness depends on their performance. Yet, our  
14 understanding of adaptive evolution at the level of modules is limited. Theory predicts that in  
15 rapidly evolving populations, such as those of many microbes, natural selection focuses on  
16 improving one or a few modules at a time and its focus shifts to other modules as adaptation  
17 continues. Such shifts have never been directly observed, their timescale is unknown and the  
18 extent to which they limit the power of natural selection to improve any particular module is  
19 unclear. Here, we empirically characterize how natural selection improves the translation  
20 machinery (TM), one of the most essential cellular modules. To this end, we experimentally  
21 evolved populations of *Escherichia coli* with genetically perturbed TMs for 1,000 generations.  
22 Populations with different TMs embarked on statistically distinct adaptive trajectories. Yet, in all  
23 genetic backgrounds, the focus of natural selection shifted away from the TM before its  
24 performance was fully restored. Our results show that shifts in the focus of selection can occur  
25 on time scales comparable to those of environmental fluctuations. Variability in selection  
26 pressures can delay the resumption of adaptation in stalled modules, which would make it  
27 difficult for evolution to fully optimize even essential modules.

## 28 Introduction

29 Biological systems are organized hierarchically, from molecules to cells, organisms and  
30 populations [1–5]. At the lowest level, macromolecules form cellular modules, such as the  
31 translation machinery, or other metabolic pathways [4,6–9]. Different modules perform different  
32 cellular functions, which together determine the fitness of the organism. Populations adapt by  
33 accumulating beneficial mutations that modify module function, which in turn can profoundly  
34 change the physiology of organisms, allowing them to consume new resources [10,11] or become  
35 resistant to drugs [12–14]. The dynamics of evolution can be extremely complex, particularly in  
36 large populations with limited recombination [14–20]. Much progress has been made recently in  
37 our theoretical and empirical characterization of these dynamics at the genetic level [15,18,19,21–  
38 24], but it is a major challenge to understand how evolution unfolds at the level of functional  
39 cellular modules [25].

40 The classical population genetics models predict that the speed of module evolution depends on  
41 the supply and the fitness effects of mutations in that module alone [26], and modules evolve  
42 independently of each other. Natural selection cannot improve a module if the fitness benefits of  
43 all beneficial mutations in it are below  $\sim 1/N$ , the inverse of the population size [27–31]. More  
44 recent work suggests that adaptive evolution of a module may reach a steady state where the  
45 fixation of beneficial mutations is counterbalanced by the accumulation of deleterious mutations  
46 [32,33]. Regardless of the nature of the limit, some cellular modules may be fundamentally not  
47 improvable by natural selection. However, classical models predict that all improvable modules  
48 would adapt, albeit at module-specific rates.

49 In many populations, particularly in microbes, beneficial mutations are common and  
50 recombination is rare, which violates the assumptions of classical models [14,16,17,20]. Then,  
51 multiple new mutations affecting different modules may simultaneously arise, they compete with  
52 each other and prevent each other from fixing [21–23,34,35]. In this so-called “clonal interference”  
53 regime, small-effect mutations are usually outcompeted. Instead, adaptation is driven by mutations  
54 that provide fitness benefits above a certain “clonal interference” threshold, which depends on the  
55 supply and the fitness effects of all adaptive mutations in the genome [23,34,36]. Thus, modules  
56 do not evolve independently, and the rate of adaptation in any one module depends on the supplies  
57 and effects of beneficial mutations in all modules.

58 The dynamics of module evolution in the clonal interference regime can be qualitatively different  
59 from those in the absence of clonal interference. At any given time, modules where many  
60 mutations provide fitness benefits above the current clonal interference threshold will accumulate  
61 adaptive mutations. All other modules would not adapt, that is modules both modules that are not  
62 improvable and modules that are improvable but only by mutations with fitness effects below the  
63 clonal interference threshold. We refer to this phenomenon as “evolutionary stalling”.

64 Evolutionary stalling limits the power of natural selection to improve a module. However, in  
65 contrast to the hard limits imposed by the drift barrier or by the balance between beneficial and  
66 deleterious mutations, evolutionary stalling can be overcome. Once the supply of the adaptive  
67 mutations with the largest effects is diminished, the clonal interference threshold would drop. As  
68 a result, previously stalled modules may come into the focus of natural selection, while those that  
69 were previously adapting may in turn stall. Such shifts in the focus of natural selection are expected  
70 to occur as long as the supplies and the fitness effects of adaptive mutations are sufficiently

71 variable between modules. However, because these quantities are unknown, it is unclear whether  
72 the theoretically predicted shifts can occur on faster time scales than environmental fluctuations  
73 and to what extent they limit the power of natural selection to improve any particular module.

74 Numerous previous studies have demonstrated that selection is often focused on improving a  
75 relatively small number of cellular modules, in both natural and experimental populations [15,37–  
76 54], suggesting that adaptive evolution in other modules is stalled. However, these studies do not  
77 attempt to identify the time scale on which the focus of natural selection shifts between modules  
78 nor do they inform us whether these shifts slow down module improvements.

79 A shift in the focus of selection is associated with the onset of evolutionary stalling in one or  
80 multiple modules and can be detected in two ways. If we can directly measure the physiological  
81 performance of a module over time, an abrupt reduction in the rate of its phenotypic improvement  
82 despite steady increases in fitness would indicate the onset of stalling. However, it is often unclear  
83 which aspects of a module's performance are relevant for fitness. Alternatively, if we know all the  
84 genes that encode a module, we could infer the onset of stalling from an abrupt reduction in the  
85 rate of accumulation of mutations in such genes despite continued accumulation of beneficial  
86 mutations elsewhere in the genome. A recent study of a 60,000 generation long evolution  
87 experiment in *Escherichia coli* (*E. coli*) used such genomic approach and found that the statistical  
88 distribution of mutations among genes and operons changes over time [51]. This observation  
89 implies that the focus of natural selection shifts from some genes and operons to others. However,  
90 because most cellular modules are insufficiently well annotated, one cannot rule out the  
91 possibility that all evolving genes encode the same set of modules, such that the shifts in the focus  
92 of natural selection occur within but not between modules.

93 To overcome these difficulties and characterize the onset of evolutionary stalling, we  
94 experimentally examine the evolution of the translation machinery (TM) in *E. coli*. There are two  
95 reasons for this choice. First, TM is an essential component of every living cell, and TM  
96 performance is a major component of fitness. Second, TM is encoded by an extremely well  
97 annotated set of genes [8,9,55–57], which allows us to use the genomic approach for detecting  
98 evolutionary stalling. We disrupted the TM by replacing the native Elongation Factor Tu (EF-Tu)  
99 in *E. coli* with several of its orthologs [58–60] and evolved these strains in rich media where rapid  
100 and accurate translation is required for fast growth [61,62]. We hypothesized that more severe  
101 disruptions of the TM will increase the supply of large-effect beneficial mutations in the TM [63].  
102 Thus, we expect that natural selection would focus on improving the TM in at least some strains  
103 with disrupted TMs, but not in the control strain which carries the native *E. coli* EF-Tu. We then  
104 set out to characterize the onset of evolutionary stalling in the TM in two ways. First, we determine  
105 which strains acquire substitutions in the known TM genes and how much fitness these strains  
106 gain. This allows us to quantify whether natural selection is able to fully restore TM performance  
107 before its focus shifts to other cellular modules. Second, we observe how the rate of accumulation  
108 of mutations in the TM changes over time, which provides us with direct evidence for the onset of  
109 evolutionary stalling on short time scales relevant for the evolution in natural populations.

110

## 111 Results

112 We previously replaced the native EF-Tu in *E. coli* with its orthologs from *Salmonella*  
113 *typhimurium*, *Yersinia enterocolitica*, *Vibrio cholerae* and *Pseudomonas aeruginosa* and one  
114 reconstructed ancestral variant [58] (Table 1). EF-Tu is encoded in *E. coli* by two paralogous  
115 genes, *tufA* and *tufB*, with the majority of the EF-Tu molecules being expressed from *tufA* [64].  
116 To replace all EF-Tu molecules in the cells, the *tufB* gene was deleted and the foreign orthologs  
117 were integrated into the *tufA* locus [58]. We also included the control strain in which the *tufB*  
118 gene was deleted and the original *E. coli tufA* was left intact. We refer to the engineered  
119 “founder” *E. coli* strains as E, S, Y, V, A and P by the first letter of the origin of their *tuf* genes  
120 (Table 1).

121

| Strain | EF-Tu origin species              | Number of amino acid differences from <i>E. coli</i> EF-Tu (percent identity) | Fitness $\pm$ SEM, % per generation |
|--------|-----------------------------------|-------------------------------------------------------------------------------|-------------------------------------|
| E      | <i>Escherichia coli</i> (control) | 0 (100)                                                                       | $0 \pm 0.7$                         |
| S      | <i>Salmonella typhimurium</i>     | 1 (99.75)                                                                     | $+0.49 \pm 0.09$                    |
| Y      | <i>Yersinia enterocolitica</i>    | 24 (93.91)                                                                    | $-3.02 \pm 0.03$                    |
| V      | <i>Vibrio cholerae</i>            | 51 (87.06)                                                                    | $-19.0 \pm 1.1$                     |
| A      | Reconstructed ancestor            | 21 (94.67)                                                                    | $-34.4 \pm 0.7$                     |
| P      | <i>Pseudomonas aeruginosa</i>     | 62 (84.38)                                                                    | $-35.0 \pm 0.2$                     |

122 **Table 1. Founders used for the evolution experiment.** Strains with foreign EF-Tu orthologs are ordered by their fitness  
123 relative to the control E strain. SEM stands for standard error of the mean.

124 We first quantified the TM defects in our founder strains. Kaçar et al. showed that EF-Tu  
125 replacements lead to declines in the *E. coli* protein synthesis rate and proportional losses in  
126 growth rate in the rich laboratory medium LB [58]. In our subsequent evolution experiment,  
127 natural selection will favor genotypes with higher competitive fitness, which may have other  
128 components in addition to growth rate [65–69]. We confirmed that EF-Tu replacements caused  
129 changes in competitive fitness relative to the control E strain (Table 1), and that competitive  
130 fitness and growth rate were highly correlated (Figure S1). We conclude that the competitive  
131 fitness of our founders in our environment reflects their TM performance. Further, we found that  
132 the fitness of the S and Y founders were similar to that of the control E strain ( $\leq 3\%$  fitness  
133 change) indicating that their TMs were not substantially perturbed. In contrast, the fitness of the  
134 V, A and P founders were dramatically lower ( $\geq 19\%$  fitness decline; Table 1) indicating that  
135 their TMs were severely perturbed.

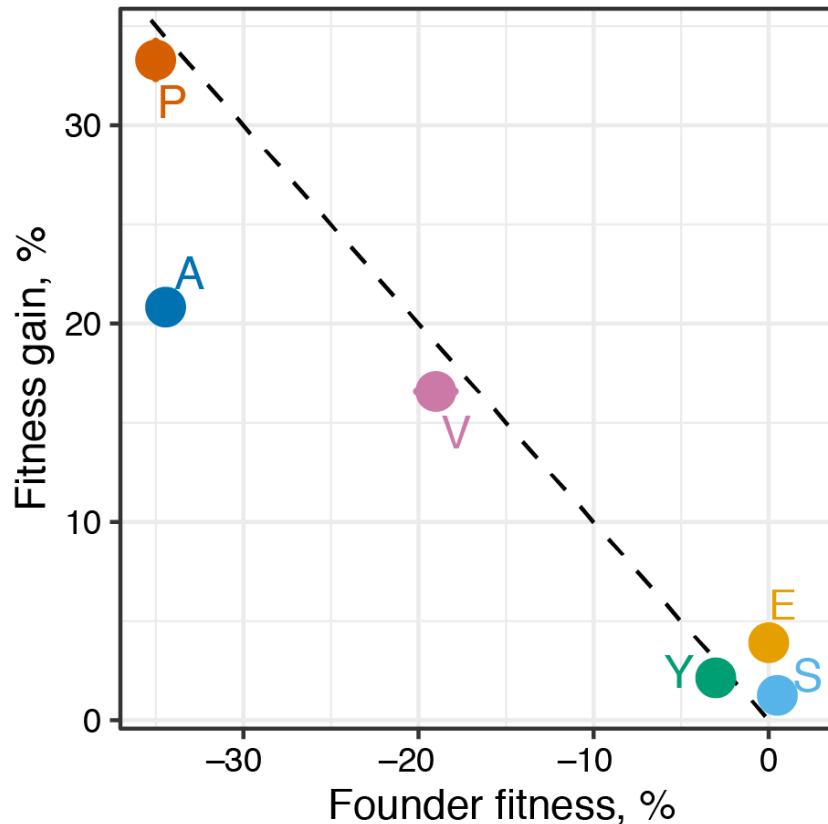

136  
137  
138  
139  
140  
141  
142

**Figure 1. Competitive fitness of founder and evolved populations.** The competitive fitness gain after evolution relative to the unevolved founder averaged across replicate populations (y axis) is plotted against the competitive fitness of the founder relative to the E strain (x axis). Fitness is measured in % per generation. Dashed black line is  $y = -x$ . Populations above (below) this line are more (less) fit than the control E strain, under the assumption that fitness is transitive. Error bars showing  $\pm 1$  SEM are masked by the symbols (see Table 1 and Figure S2).

## 143 Clonal interference slows down TM adaptation

144 To determine whether natural selection focuses on restoring defective TMs, we instantiated 10  
145 replicate populations from each of our six founders (60 populations total) and evolved them in  
146 LB for 1,000 generations (Methods) with daily  $1:10^4$  dilutions and the bottleneck population size  
147  $N = 5 \times 10^5$  cells. We then measured the competitive fitness of the evolved populations relative to  
148 their respective founders. Fitness in all but one population increased significantly (t-test  $P < 0.05$   
149 after Benjamini-Hochberg correction; Figure S2), and the average fitness increase of a  
150 population correlated negatively with the initial fitness of its founder (Figure 1). These results  
151 show that even substantial fitness defects caused by reductions in TM performance can be  
152 largely compensated in a short bout of adaptive evolution.

153 The pattern of “declining adaptability” in Figure 1 has been frequently observed in previous  
154 microbial evolution studies [45,46,50,70–74]. It could arise if adaptation is driven either by  
155 mutations only in the TM, by mutations only in other modules, or by mutations in the TM and in  
156 other modules. For evolutionary stalling in the TM to occur, mutations improving the TM must  
157 compete against other types of mutations within the same population. To determine whether both  
158 types of mutations occur in our populations, we conducted whole-population whole-genome

159 sequencing at multiple timepoints throughout the evolution experiment. This sequencing strategy  
160 allows us to directly observe competition dynamics between mutations in different modules  
161 [15,51,75,76].

162 We selected replicate populations 1 through 6 descended from each founder (a total of 36  
163 populations), sampled each of them at 100-generation intervals (a total of 11 time points per  
164 population) and sequenced the total genomic DNA extracted from these samples. We developed  
165 a bioinformatics pipeline to identify de novo mutations in this data set (Methods). Then, we  
166 called a mutation adaptive if it satisfied two criteria: (i) its frequency changed by more than 20%  
167 in a population; and (ii) it occurred in a “multi-hit” gene, i.e., a gene in which two independent  
168 mutations passed the first criterion. Reliably tracking the frequencies of some types of mutations  
169 (e.g., large copy-number variants) is impossible with our sequencing approach. Therefore, we  
170 augmented our pipeline with the manual identification of copy-number variants which could only  
171 be reliably detected after they reached high frequency in a population (Methods and Figure S3).

172 This procedure yielded 167 new putatively adaptive mutations in 28 multi-hit genes, with the  
173 expected false discovery rate of 13.6%, along with an additional 11 manually-identified  
174 chromosomal amplifications, all of which span the *tufA* locus (Methods and Table S1, Figure  
175 S4). We classified each putatively adaptive mutation as “TM-specific” if the gene where it  
176 occurred is annotated as translation-related (Methods). We classified mutations in all other genes  
177 as “generic”. We found that 38 out of 178 (21%) putatively adaptive mutations in 6 out of 28  
178 multi-hit genes were TM-specific (Table S1). This is significantly more mutations than expected  
179 by chance ( $P < 10^{-4}$ , randomization test) since the 215 genes annotated as translation-related  
180 comprise only 4.0% of the *E. coli* genome. All of the TM-specific mutations occurred in genes  
181 whose only known function is translation-related, such as *rpsF* and *rpsG*, suggesting these  
182 mutations arose in response to the initial defects in the TM. The set of TM-specific mutations is  
183 robust with respect to our filtering criteria (Figure S5).

184 TM-specific mutations occurred in 17 out of 36 sequenced populations. Generic mutations were  
185 also observed in all of these populations (Figure S4). Thus, whenever TM-specific mutations  
186 occurred, generic mutations also occurred, such that the fate of TM-specific mutations must have  
187 depended on the outcome of clonal interference between mutations within and between modules  
188 (Figure 2). As a result of this competition, only 14 out of 27 (52%) TM-specific mutations that  
189 arose (excluding 11 *tufA* amplications) went to fixation, while the remaining 13 (48%)  
190 succumbed to clonal interference (Figures 2, S4). In at least two of these 13 cases a TM-specific  
191 mutation was outcompeted by expanding clones likely driven by generic mutations: in  
192 population V6, a TM-specific mutation in *fusA* was outcompeted by a clone carrying generic  
193 mutations in *fimD*, *ftsI* and *hslO* (Figure 2); in population P3, a TM-specific mutation in *tufA* was  
194 outcompeted by a clone carrying generic mutations in *amiC* and *trkH* (Figure 2). We conclude  
195 that, while TM-specific beneficial mutations are sufficiently common and their fitness effects are  
196 at least sometimes large enough to successfully compete against generic mutations, clonal  
197 interference reduces the power of natural selection to recover TM performance.

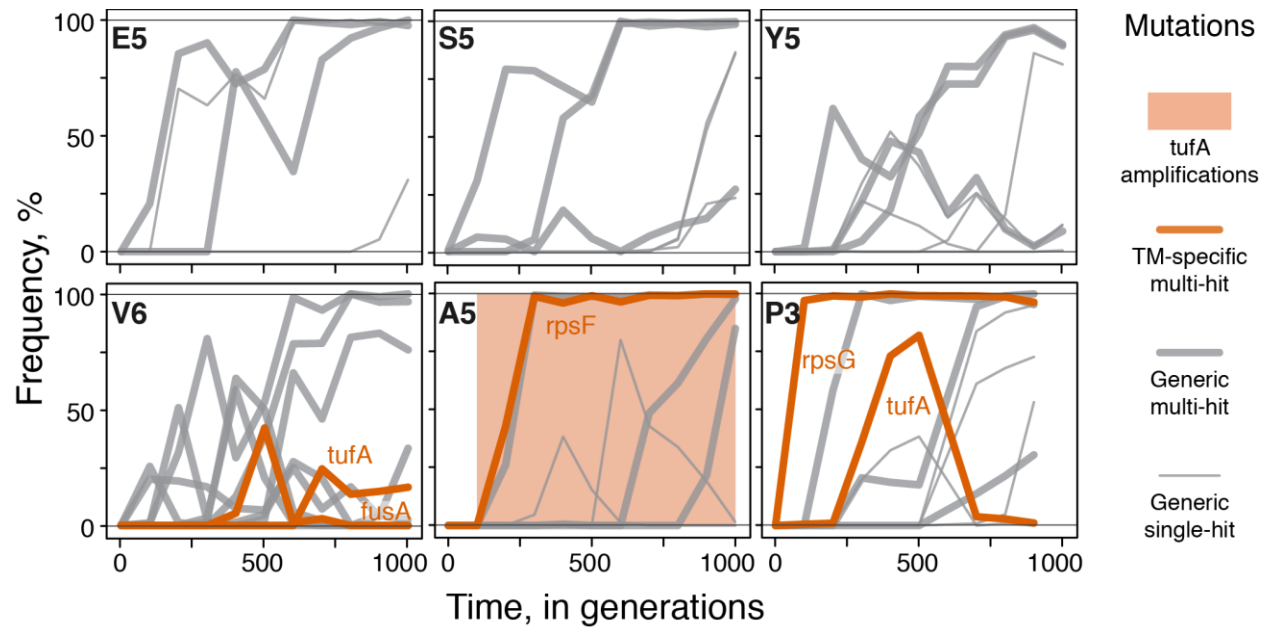

198  
199  
200  
201  
202

**Figure 2. Mutational trajectories in evolving populations.** Mutation frequency trajectories for one representative replicate population per founder is shown (complete data for all sequenced populations can be found in Figure S4). Each line represents the frequency trajectory of a single mutation. Shading indicates the range of timepoints in which a *tufA* amplification was detected.

203 The onset evolutionary stalling and a limit on the power of natural  
204 selection to improve the TM

205 Competition between adaptive mutations in different modules is necessary but not sufficient for  
206 evolutionary stalling to occur in any one module. Therefore, we sought direct evidence of  
207 evolutionary stalling in the TM. To this end, we examined the distribution of TM-specific  
208 mutations among populations derived from different founders.

209 In the A and P founders, defects in the TM incur a fitness cost of about 35% (Table 1), and we  
210 observed a total of 30 TM-specific mutations in these populations (Figure 3A), including eight  
211 *tufA* amplifications (2.5 mutations on average per population). At least one TM-specific mutation  
212 fixed in each of these populations (Figure S4). Thus, when the TM defect is large, highly  
213 beneficial mutations in the TM are available, and natural selection is focused on improving this  
214 module.

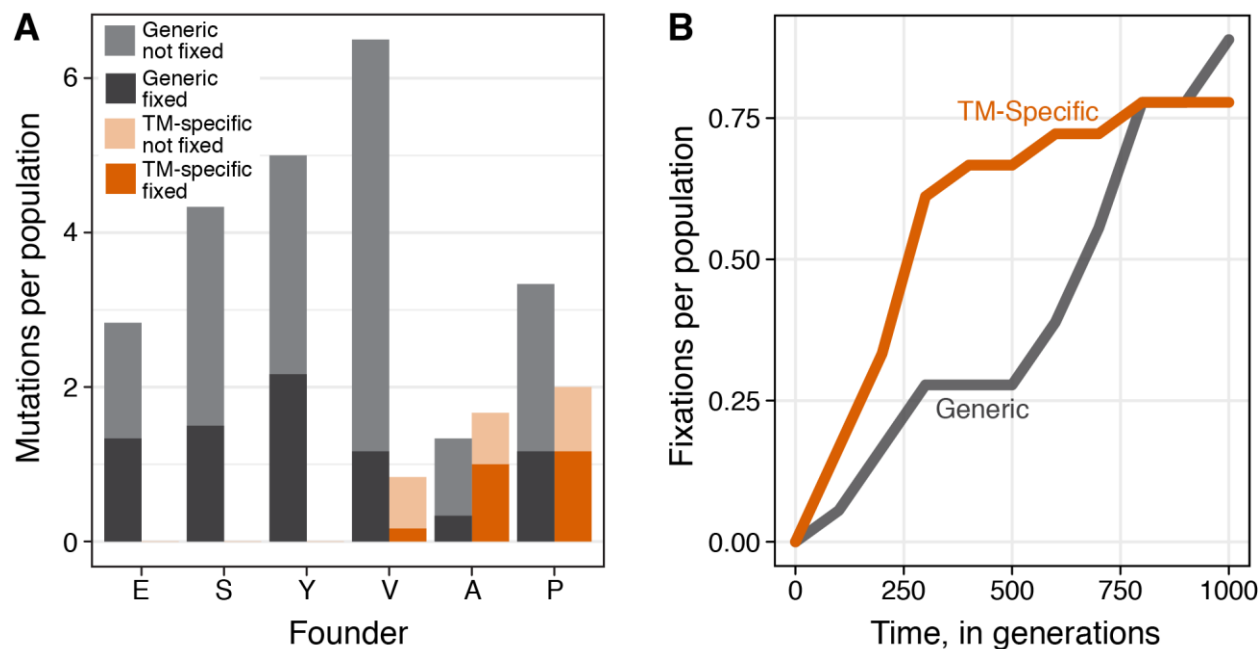

215  
216  
217  
218  
219

**Figure 3. Evidence for evolutionary stalling in the adaptation of the TM.** **A.** The average number of fixed and not fixed adaptive TM-specific and generic mutations across the six sequenced populations derived from each founder. **B.** Cumulative number of fixed TM-specific or generic mutations per population derived from the V, A and P founders.

220 In the V founder, a defect in the TM incurs a fitness cost of about 19% (Table 1), and we  
221 observed a total of 8 TM-specific mutations across all V populations, including three *tufA*  
222 amplifications (1.3 mutations on average per population). However, only 2 out of 6 populations  
223 fixed at least one TM-specific mutation (Figure S4). Thus, TM defects with a fitness cost of 19%  
224 are improvable by mutations, but these mutations provide benefits that are barely enough to  
225 survive clonal interference. We conclude that when a TM defect incurs a fitness cost of around  
226 19%, the focus of natural selection begins to shift to other cellular modules, and the adaptation of  
227 the TM begins to stall.

228 Given that the TM adaptation is beginning to stall in the V populations, we predict that no TM-  
229 specific mutations would fix in the E, S and Y populations, as their TM defects are much  
230 smaller. Consistent with this prediction, we do not observe any TM-specific mutations in the E, S  
231 and Y populations (Figure 3A). Interestingly, the Y populations gained on average 2.1% in  
232 fitness by fixing on average 2.2 generic mutations. This implies that natural selection in the Y  
233 populations is improving modules other than the TM, even though their TM incurs a ~3% fitness  
234 cost (Table 1).

235 We also expect that as the V, A, and P populations accumulate TM-specific mutations and TM  
236 performance improves, the focus of natural selection should shift away from the TM to other  
237 cellular modules. We examined the distribution of TM-specific and generic adaptive mutations  
238 across evolutionary time in these populations. Out of the 14 TM-specific mutations that  
239 eventually fixed, 12 (86%) did so in the first selective sweep (this excludes 11 *tufA*  
240 amplifications). In contrast, out of the 16 generic mutations that fixed, only seven (44%) did so  
241 in the first selective sweep. As a result, an average TM-specific beneficial mutation reached  
242 fixation after only  $300 \pm 52$  generations, compared to  $600 \pm 72$  generations for an average  
243 generic mutation (Figure 3B, S4). Only one (7%) TM-specific beneficial mutation reached



244 fixation after generation 600, in comparison to nine (56%) generic beneficial mutations. Thus, by  
245 the end of the experiment, the fixation of TM-specific mutations has essentially ceased. Yet,  
246 these populations remained on average ~5.3% less fit than the control E strain, assuming fitness  
247 is transitive (Figure 1). Even if we conservatively attribute all these fitness gains to  
248 improvements in the TM, this observation suggests that the evolved TMs have not reached the  
249 level of performance of the TM in the control E founder. As with the Y founder, we conclude  
250 that the TMs in these evolved V, A and P populations has stalled before TM performance was  
251 fully recovered.

252 For adaptive mutations in the TM to fix, they must provide fitness benefits above the clonal  
253 interference threshold. To determine where this threshold is in P and A populations which fixed  
254 most of the TM-specific mutations, we selected two TM-specific mutations that arose in these  
255 populations, genetically reconstructed them in their respective founders and directly measured  
256 their fitness benefits. We found that the TM-specific mutation A74G in the *rpsF* gene, which  
257 arose in population A5, provides an  $8.2 \pm 1.0\%$  fitness benefit in the A founder. And the TM-  
258 specific mutation G331A in gene *rpsG*, which arose in populations P2, P3 and P5, provides a  $6.5$   
259  $\pm 1.2\%$  fitness benefit in the P founder. This result suggests that the clonal interference threshold  
260 in the A and P populations is below 8.2% and 6.5%, respectively. Similarly, by reconstructing  
261 mutation T193D in the *ybeD* gene, we estimated that the clonal interference threshold in the V  
262 populations was below 5.9%. Finally, the upper bound on the clonal interference threshold in the  
263 Y, S, and E populations can be estimated from the total fitness gains in these populations (Figure  
264 1), and it is below 2.1%, 1.3% and 3.9%, respectively.

## 265 Epistasis and historical contingency in TM evolution

266 We observed that natural selection improved all severely perturbed TMs, but it is unclear  
267 whether different TM defects can be alleviated by a common set of mutations or whether  
268 repairing each TM defect requires its own unique genetic solution. Previous work has shown that  
269 genetic interactions (or “epistasis”) between mutations in the TM have been important in the  
270 evolutionary divergence of TMs along the tree of life [58,77–80]. We reasoned that genetic  
271 interactions might be similarly important in the short bout of evolution observed in our  
272 experiment. Specifically, we asked whether different initial TM variants acquired adaptive  
273 mutations in the same or in different translation-associated genes.

274 We found that 4 out of 7 classes of TM-specific mutations arose in a single founder (Figure 4A).  
275 For example, we detected six independent mutations in the *rpsG* gene, which encodes the  
276 ribosomal protein S7, and all of these mutations occurred in the P founder ( $P < 10^{-4}$ ,  
277 randomization test with Benjamini-Hochberg correction, Methods). Similarly, all four mutations  
278 in the *rpsF* gene, which encodes the ribosomal protein S6, occurred in the A founder ( $P < 10^{-4}$ ,  
279 randomization test with Benjamini-Hochberg correction). To directly measure how the effects of  
280 these mutations vary across genetic backgrounds, we attempted to genetically reconstruct  
281 mutation A74G in the *rpsF* gene and mutation G331A in *rpsG* gene in all six of our founder  
282 strains. We successfully reconstructed both of these mutations in the founder strains in which  
283 they arose and confirmed that they were strongly beneficial, as described above ( $8.2 \pm 1.0\%$  and  
284  $6.5 \pm 1.2\%$  benefit, respectively). In contrast, our multiple reconstruction attempts in all other  
285 founders were unsuccessful (Methods), suggesting that these mutations are strongly deleterious  
286 in all other genetic backgrounds that we tested.

287 These results suggest that genetic interactions between different TM components cause initially  
 288 different TM variants to embark on divergent adaptive trajectories and lead to historical  
 289 contingency and entrenchment in TM evolution [81–83].

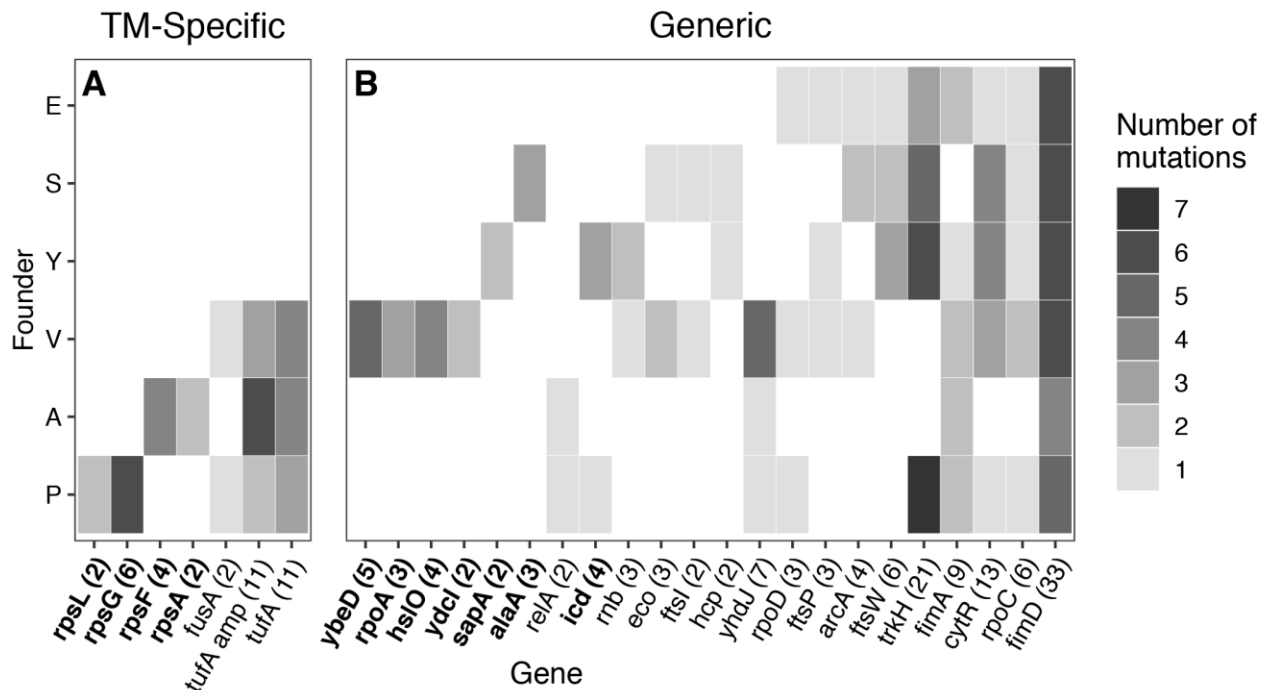

290  
 291 **Figure 4. Distribution of putatively adaptive mutations.** Heatmap of all putatively adaptive mutations  
 292 identified via whole-genome sequencing, grouped by founder and by gene. Amplification of the *tufA*  
 293 locus are counted separately from other mutations in *tufA*. **A.** Translation-associated genes **B.** All other  
 294 genes. Genes in bold are those where mutations were detected in significantly fewer founders than  
 295 expected by chance ( $P < 0.05$ , Benjamini-Hochberg correction, see Methods). Numbers in parentheses  
 296 indicate the total number of mutations in that gene observed across all sequenced populations.

## 297 Genome-wide adaptive responses to TM perturbations

298 Adaptive evolution of the TM stalls because natural selection acts on multiple cellular modules  
 299 in *E. coli*, all of which are encoded on a single non-recombining chromosome. However,  
 300 modules are linked not only physically by the encoding DNA but also functionally in that they  
 301 all contribute to the fitness of the organism. This functional interdependence implies that  
 302 mutations in one module may alter the selection pressure on other modules. For example,  
 303 improvements in translation efficiency may increase the selection pressure to improve efficiency  
 304 of catabolic reactions, analogously to the “shifting and swaying of selection coefficients” on  
 305 enzymes in the same metabolic pathway discussed in the classic work by Hartl et al. [27].  
 306 Therefore, in addition to intra-module epistasis demonstrated above we might expect inter-  
 307 module epistasis, such that initially different TM variants could precipitate distinct adaptive  
 308 responses in the rest of the genome. To test this hypothesis, we examined the distribution of  
 309 generic mutations among founder genotypes.

310 We found that generic mutations in 7 out of 22 genes occurred in fewer founders than expected  
 311 by chance (Figure 4B, Methods). For example, we detected five independent mutations in the  
 312 *ybeD* gene, which encodes a protein with an unknown function, and all these mutations occurred  
 313 in the V founder ( $P < 10^{-4}$ , randomization test with Benjamini-Hochberg correction). Similarly,

314 all three mutations in the *alaA* gene, which encodes a glutamate-pyruvate aminotransferase,  
315 occurred in the A founder ( $P < 10^{-4}$ , randomization test with Benjamini-Hochberg correction).  
316 To corroborate these statistical observations, we reconstructed the T93G mutation in the *ybeD*  
317 gene in all six founder strains and directly measured its fitness effects. As expected, this  
318 mutation confers a 5.9% fitness benefit in the V founder. In contrast, it is strongly deleterious in  
319 the P founder and indistinguishable from neutral in the remaining founders (Figure 5). These  
320 results show that at least some genetic perturbations in the TM can have genome-wide  
321 repercussions. They can precipitate bouts of genome-wide adaptive evolution that are contingent  
322 on the initial perturbations in the TM.

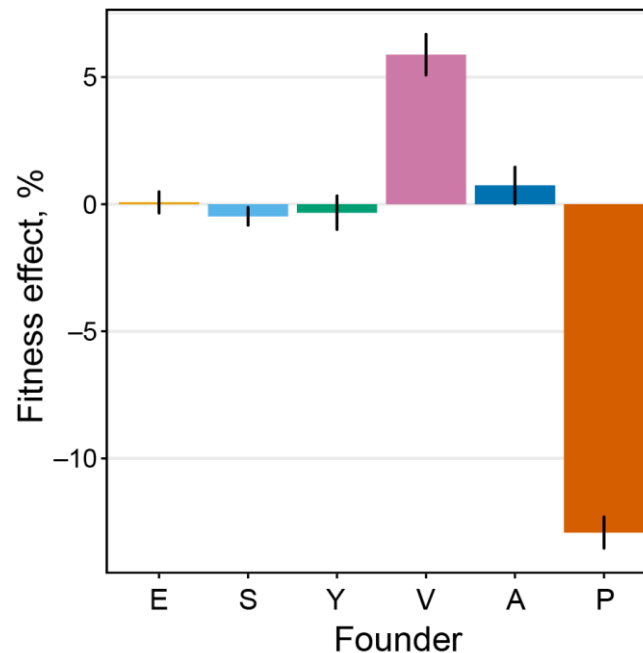

323

324 **Figure 5. Fitness effect of the *ybeD* T193D mutation in different founders.** Fitness effect of the  
325 mutation is measured in a direct competition of each founder with the mutation against the founder without  
326 the mutation. Error bars show the SEM.

327

## 328 Discussion

329 The fitness of an organism depends on the performance of many molecular modules inside cells.  
330 While natural selection favors genotypes with better-performing modules, it is difficult for  
331 evolution to improve multiple modules simultaneously, particularly when recombination rates  
332 are low and many adaptive mutations in different modules are available. In this regime, natural  
333 selection is expected to focus on those modules where mutations provide large fitness benefits,  
334 while the adaptive evolution in other modules stalls. Here we have documented and  
335 characterized the onset of evolutionary stalling in the adaptation of the translation machinery  
336 (TM) in *E. coli*.

337 We found that populations whose TMs were initially severely perturbed (incurring ~35% fitness  
338 cost) rapidly discovered and fixed TM-specific beneficial mutations. Populations whose TM had  
339 a intermediately strong defect (incurring ~19% fitness defect), discovered TM-specific  
340 mutations, but only some of these populations were able to fix them due to clonal interference.  
341 Thus, adaptive evolution of the TM begins to stall when the TM defect incurs a fitness cost of  
342 about 19%. As a consequence, populations whose TMs were initially mildly perturbed (incurring  
343  $\lesssim 3\%$  fitness cost) adapted by acquiring mutations that did not directly affect the TM.  
344 Furthermore, even in populations where TM-specific mutations occurred, their fixations  
345 essentially ceased by the end of the experiment, while mutations in other modules continued to  
346 accumulate. Our results imply that the focus of natural selection shifted from the TM to other  
347 modules in the cell within ~600 generations (about 1 to 2 fixation events), before the  
348 performance of the original unperturbed TM was fully recovered.

349 There could be two explanations for why the focus of natural selection shifts away from the TM,  
350 despite it still being defective. First, there may simply be no more TM-specific beneficial  
351 mutations available, i.e., natural selection may have reached its limit on TM improvement.  
352 Alternatively, TM-specific beneficial mutations are available but provide fitness benefits that are  
353 too small to overcome clonal interference. We favor the latter explanation because both  
354 theoretical and empirical (albeit limited) evidence suggest that small-effect beneficial mutations  
355 should be more common than large-effect mutations [24,84–86]. The fact that we observed TM-  
356 specific mutations with effects  $\geq 5\%$  indicates that the rate of such mutations is relatively high,  
357 and we can expect the rate of TM-specific mutations with effects  $< 5\%$  to be even higher. In fact,  
358 if we relax the stringency criteria for detecting beneficial mutations, we find one TM-specific  
359 mutation in the gene *rbbA* in the population E5 (Figure S5). This suggests that small-effect TM-  
360 specific beneficial mutations do arise and supports the conjecture that adaptation of the TM  
361 stalled rather than stopped.

362 Our results give us a glimpse of the fitness landscape of the TM. This landscape appears to be  
363 broadly consistent with Fisher's geometric model [85,87,88] in that more defective TMs have  
364 access to beneficial mutations with larger fitness benefits than less defective TMs. However,  
365 Fisher's model does not inform us how many distinct genotypes encode highly performing TMs  
366 and how they are connected in the genotype space. We observed that the different founders  
367 gained distinct TM-specific adaptive mutations. This suggests that the high-performance TMs  
368 can be encoded by multiple genotypes that either form a single contiguous neutral network [89]  
369 or multiple isolated neutral networks [90]. Moreover, we observed that most of our populations  
370 with initially severely perturbed TMs were able to discover TM-specific mutations. This

371 suggests that genotypes that encode high-performing TMs may be present in the mutational  
372 neighborhoods of many genotypes [89,91].

373 In this work, we identified several TM-specific adaptive mutations, but their biochemical and  
374 physiological effects are at this point unknown. However, the fact that 11 chromosomal  
375 amplifications and 12 noncoding or synonymous events occurred in the *tufA* operon suggests that  
376 some of the TM-specific mutations are beneficial because they adjust EF-Tu abundance in the  
377 cell. This would be consistent with previous evolution experiments [42,92,93]. Directly  
378 measuring the phenotypic effects of the TM-specific mutations described here is an important  
379 avenue for future work.

380 Our results show that evolutionary stalling limits the ability of natural selection to improve a  
381 module, but this limit is not absolute. As a population accumulates beneficial mutations in other  
382 modules, their supply will be depleted and their fitness effects will likely decrease due to  
383 diminishing returns epistasis [50,63,70,71,94,95]. These changes will in turn increase the  
384 chances for small-effect mutations in the focal module to survive clonal interference thereby  
385 overcoming evolutionary stalling. While we did not observe resumption of adaptive evolution in  
386 the TM in this experiment, we find some evidence for such a transition in one other module. We  
387 detected 11 mutations in multi-hit genes that affect cytokinesis (Methods, Figures S6, S7). Most  
388 of these mutations reached high frequency in the second half of the experiment, suggesting that  
389 adaptation in the cytokinesis module was initially stalled and then resumed.

390 Although adaptive evolution of a stalled module can resume once large-effect mutations in other  
391 modules are depleted, variability in selection pressures can replenish the supply of these  
392 competing mutations and thereby leave the focal module stalled for long periods of time. Given  
393 that populations in nature typically experience fluctuation in selective pressures, natural selection  
394 may not be able to fully optimize any module even over long evolutionary timescales.

395 Our results imply that it is impossible to fully understand the evolution a cellular module in  
396 isolation from the genome where it is encoded and the population-level processes that govern  
397 evolution. The ability of natural selection to improve any one module depends on the population  
398 size, the rate of recombination, the supply and the fitness effects of all beneficial mutations in the  
399 genome and on how these quantities change as the population adapts. Further theoretical work  
400 and empirical measurements integrated across multiple levels of biological organization are  
401 required for us to understand adaptive evolution of modular biological systems.

402

## 403 Materials and methods

### 404 Materials, data and code availability

405 All strains and plasmids constructed and used in this work are available per request. Raw  
406 sequencing data were analyzed with the python-based workflow implemented in Ref. [51] and  
407 run on the UCSD TSCC computing cluster via a custom python wrapper script. All analysis and  
408 plots reported in this manuscript have been performed using the R computing environment. The  
409 script, modified reference genomes and the raw data (except for raw sequencing data) used for  
410 analysis can be found at <https://github.com/sandeepvenkataram/EvoStalling>. Raw sequencing  
411 data for this project have been deposited into the NCBI SRA under project PRJNA560969.

### 412 Media and culturing conditions

413 Liquid medium is the Luria-Bertani medium (LB) (per liter, 10 g NaCl, 5 g yeast extract, and 10  
414 g tryptone) and solid medium is LBA (LB with 1.5% agar), unless noted otherwise. All  
415 incubations were done at 37°C, and liquid cultures were shaken at 200 rpm for aeration, unless  
416 noted otherwise. All media components and chemicals were purchased from Sigma, unless noted  
417 otherwise.

### 418 Strains and plasmids

419 All strains in this study were derived from *E. coli* K12 MG1655. Strain genotypes are listed in  
420 Table S2. Complete methods for the construction of the E, S, Y, V, A and P strains, which harbor  
421 a single *tuf* gene variant replacing *tufA* gene, can be found in Ref. [58]. Strains with engineered  
422 *ybeD*, *rpsF* and *rpsG* mutations were constructed using the same method, except the  
423 chromosomal *kanR* marker was not removed (Figure S9). For a full list of primer sequences used  
424 for *ybeD*, *rpsF* and *rpsG* engineering, see Table S2.

425 Plasmids pZS1-TnSL and pZS2-TnSL were used in competition assays to provide Ampicillin  
426 and Kanamycin resistance, respectively. pZS1-TnSL, derived from pUA66 [96], was kindly  
427 provided by Georg Rieckh. pZS2-TnSL was constructed from pZS1-TnSL by replacing the  
428 *ampR* cassette with *kanR*.

### 429 Evolution experiment

430 Experimental evolution was performed by serial dilution at 37°C in LB broth. To start the  
431 evolution experiment, an initial 5 mL overnight culture was inoculated from a single colony from  
432 the frozen stock of each founder strains. 10 replicate populations were started from single  
433 colonies derived from these overnight cultures. The replicates were serially transferred every 24h  
434 ( $\pm 1$ h) as follows: 100  $\mu$ L of saturated culture were transferred into 10 mL saline solution (145  
435 mM NaCl), 50  $\mu$ L of these dilutions were then transferred to 5 mL fresh LB (tubes were  
436 vigorously vortexed prior to pipetting). This resulted in a bottleneck population size of about  
437  $5 \times 10^5$  cells. Freezer stocks (200  $\mu$ L of 20% glycerol + 1 mL saturated culture) were prepared  
438 approximately every 100 generations and stored at  $-80^\circ\text{C}$ .

## 439 Competitive fitness assays

440 To carry out pairwise competition assays, an Ampicillin-resistant and a Kanamycin-resistant  
441 versions of the query and reference strains/populations were generated by transforming these  
442 strains/populations with plasmids pZS1-TnSL and pZS2-TnSL, using standard methods [97].  
443 Two replicate competition assays were performed for each query-reference pair with reciprocal  
444 markers (four assays total per pair), except for allele-replacement mutants (see below). To  
445 validate that the resistance-marker plasmids do not differentially impact fitness in any of the six  
446 founder genetic backgrounds, we carried out three-way competition assays between the KanR-  
447 marked, AmpR-marked and the unmarked versions of the founders (Figure S8). Since the allele-  
448 replacement mutants carry a chromosomal *kanR* marker (see above), they were only competed  
449 against AmpR reference strains.

450 To start a competition assay, a query and a reference cultures were scraped from frozen stocks  
451 and inoculated into 5 mL LB-Amp or LB-Kan media as appropriate. After about 24 hours, the  
452 query and the reference cultures were mixed together in ratio 1:9 and diluted 1:10,000 into 5 mL  
453 fresh LB media. After that, the mixed culture was propagated as in the evolution experiment. To  
454 determine the relative abundances of the query and reference individuals in the mixed culture,  
455 100  $\mu$ l of appropriately diluted cultures were plated on both LB-Amp and LB-Kan plates after  
456 24, 48 and 74 hours of competition. For some competitions, where fitness differences were  
457 particularly large or small, samples from 0 or 96 hours were also obtained. Plates were  
458 photographed after an ~24-hour incubation period (when colonies were easily visible) and  
459 colonies were automatically counted with the OpenCFU software [98]. In each competition, we  
460 estimated the fitness of the query strain relative to the reference strain by linear regression of the  
461 natural logarithm of the ratio of the query to reference strain dilution-adjusted colony counts  
462 against time. Variance was also estimated from these regressions. Replicate measurements were  
463 combined into the final estimate using the inverse variance weighting method.

464 Competitions between two reciprocally marked versions of the same strain represent a special  
465 case. If the two marker-carrying plasmids impose exactly the same fitness cost, our competition  
466 assay between two reciprocally marked versions of the same strain is fully symmetric, which  
467 implies that in expectation it must yield a fitness value of exactly zero. Any estimate of fitness  
468 from a finite number of measurements even in such idealized fully symmetric case will not zero.  
469 However, such deviations from zero would reflect only measurement noise rather than any  
470 biologically meaningful fitness difference. In reality, the two marker-carrying plasmids may  
471 impose slightly different fitness costs, but because the difference in the cost is detectable (see  
472 above), we still interpret deviations from zero in our fitness estimates as noise. Therefore, in  
473 competitions of reciprocally marked versions of the same strain, we set our fitness estimate to  
474 zero and use the four fitness values obtained from the replicate assays to estimate the noise  
475 variance as the average of the squared fitness value.

## 476 Growth rate assays

477 Strains were inoculated from frozen stock into 5 mL LB media in 15 mL culture tubes and grown  
478 overnight. After 24 hours of growth, the cultures were diluted 1:100 into fresh 5 mL of media  
479 and grown for 4 hours. They were diluted again 1:100 into 200  $\mu$ l of LB in flat-bottom Costar 96  
480 well microplates (VWR Catalog #25381-056) and grown in a Molecular Devices SpectraMax i3x

481 Multi-mode microplate reader at 37°C with shaking for 24 hours with absorbance measurements  
482 at 600 nm every 15 minutes. Three replicate growth measurements were conducted for each  
483 strain. Optical density data were first ln-transformed. A linear regression model was fit to all sets  
484 of 5 consecutive data points where OD was below 0.1. Growth rate for the culture was estimated  
485 as the maximal slope across all of these 5-point regressions. The mean growth rate and standard  
486 error of the mean were calculated from replicate measurements.

## 487 Genome sequencing

488 Whole-genome sequencing was conducted for population samples of 6 replicate populations for  
489 each of the 6 founders (36 total populations). Each population was sequenced at 11 timepoints,  
490 every 100 generations beginning at generation 0. Four lanes of 100 bp paired end sequencing  
491 was conducted at the UCSD IGM Genomics center on an Illumina HiSeq 4000 machine. The  
492 average per-base-pair coverage across all samples was 131x. Samples E1\_t600, E2\_t500,  
493 Y3\_t600, P3\_t600, P2\_t800, P2\_t1000 and A1\_t700 yielded data inconsistent with the rest of the  
494 allele frequency trajectories from the same population, likely due to mislabelling during sample  
495 preparation. These samples were subsequently removed from our analysis.

## 496 DNA extraction and library preparation

497 To minimize competitive growth during handling, 100 µl of a 1:10,000 dilution of frozen stock  
498 from each sample was plated on LB agar plates and incubated at 37°C overnight. The entire plate  
499 of colonies was then scraped and used for genomic DNA extraction. DNA extractions were  
500 conducted using the Geneaid Presto mini gDNA Bacteria Kit (#GBB300) following the  
501 manufacturer's protocol. Library preparation was conducted using a modified Illumina Nextera  
502 protocol as described in [99].

## 503 Validation of variants with Sanger sequencing

504 43/45 variants, particularly those in loci previously annotated to be involved with translation,  
505 were validated using Sanger sequencing. Briefly, populations and timepoints containing the  
506 variant at substantial frequency were identified, and clones isolated for genomic DNA extraction,  
507 PCR and Sanger Sequencing using standard protocols. The primers used for this validation are  
508 detailed in Table S3. The two mutations that failed to validate were expected to be at relatively  
509 low frequency in their populations (17% and 38%), so additional clone sampling may be  
510 required to validate these events.

## 511 Analysis of sequencing data

### 512 Variant calling

513 Sequenced samples were mapped to the MG1655 reference genome (NCBI accession U00096.3)  
514 and variants were called using a custom breseq-based pipeline described in Supplementary text  
515 section 4 of Ref. [51] and kindly provided to us by Dr. Benjamin Good. Briefly, this method  
516 leverages the fact that each population was sampled multiple times across the evolution



517 experiment to increase our ability to distinguish real low-frequency variants from sequencing  
518 errors and other sources of noise.

519 The reference genome was modified with the appropriate *tufA* sequence for each genetic  
520 background used in the evolution experiment along with the removal of the *tufB* sequence, and  
521 annotation coordinates were lifted over to be consistent with the original MG1655 reference  
522 sequence using custom scripts. The modified reference genomes and annotation files are  
523 included in the github repository. The variants reported in Table S1 have been lifted back to be  
524 compatible with the original MG1655 reference genome.

## 525 Annotation

526 Variant annotation was conducted using the software package ANNOVAR[100]. Coding  
527 variants were established as normal, while noncoding variants were annotated as being  
528 associated with the closest gene (in either strand, in either direction) in the genome, as long as it  
529 was less than 1 kb away. As ANNOVAR is not set up to work with *E. coli* by default, the *E. coli*  
530 MG1655 nucleotide annotation was downloaded in GFF3 form from NCBI Genbank  
531 (U00096.3). Cufflinks[101] gffread tool was used to convert this file to GTF, which was then  
532 converted to GenePred by using the UCSC Genome Browser gtfToGenePred tool. The final  
533 annotation file was generated using the ANNOVAR retrieve\_seq\_from\_fasta.pl script. The  
534 annotation file was lifted over to be compatible with each reference sequence.

535 Copy number variants were called manually using genome-wide coverage plots generated using  
536 samtools[102] “view” command and the R computing environment. As these variants have their  
537 frequency confounded with their copy number, only their presence/absence was noted for  
538 downstream analysis.

## 539 Filtering

540 We considered single nucleotide polymorphisms, short insertion/deletion and the manually  
541 identified copy number variants for further analysis. Chromosomal aberrations were ignored  
542 because breseq appears to have a high false positive rate (average of 27 “junction” calls per  
543 population across all timepoints). Variants were filtered in three successive steps. (1) Variants  
544 not identified in multiple consecutive time points were removed. (2) Variants supported by less  
545 than 10 reads across all timepoints in a given population were removed. (3) Since we observed  
546 fixation events in every population and since there should be no DNA exchange, all truly  
547 segregating variants present in a population at generation 100 must either be fixed or lost in  
548 generations 900 and 1000. Thus, we removed variants that failed to do so.

549 Variants that were present at an average frequency  $\geq 95\%$  at generation 100 across at least 18  
550 populations were denoted as ancestral mutations that differentiate the founder from the reference  
551 genome ( $n = 10$ ). Variants that were not ancestral but present at  $\geq 95\%$  on average across all  
552 populations derived from one founder were denoted as founder mutations ( $n = 11$ ). These  
553 mutations were likely introduced as a byproduct of the strain engineering process. Multiallelic  
554 variants (two or more derived alleles present in a single population at the same site) were also  
555 removed as likely mapping artifacts. Finally, variants that were present at generation 100 in 11+  
556 populations (of 36 total sequenced populations) are either mapping artifacts or pre-existing  
557 variants and were not considered further ( $n = 169$ , including the 10 ancestral mutations identified  
558 earlier).

## 559 Identification of adaptive mutations

560 The putatively adaptive mutations were identified as follows. We first identified mutations that  
561 reached at least 10% frequency, were present in at least two consecutive time points and whose  
562 frequency changed by at least 20% throughout the evolution. We then merged together such  
563 mutations within 10 bp of each other as likely being derived from a single event. This resulted in  
564 a set of candidate adaptive mutations. To identify likely adaptive mutations in this candidate set,  
565 we considered only mutations in “multihit” genes, i.e., genes with 2 or more candidate adaptive  
566 mutations.

## 567 Identification of modules in the genome

568 The 215 genes annotated as being associated with translation were identified using the Gene  
569 Ontology database at <http://geneontology.org/> by searching for all *E. coli* K12 genes that were  
570 identified in a search for “translation OR ribosom”. Similarly, the 45 genes associated with  
571 cytokinesis were identified using a search for “cytokinesis”.

## 572 Statistical analyses

573 The expected number of mutations in multihit genes was calculated via multinomial sampling.  
574 Mutations were randomly redistributed across all genes in the *E. coli* genome controlling for  
575 variation in gene length. The average of 10,000 such randomizations was used to calculate an  
576 empirical FDR. A similar procedure was used to estimate the probability of observed as many or  
577 more TM-specific mutations by chance as we actually observed in this study.

578 To test whether mutations in the 7 TM-specific multi-hit loci were distributed uniformly across  
579 the six founders we first estimated the entropy of the distribution of mutations across founders  
580 for each gene. Mutations in that gene were then randomly redistributed across six founders  
581 10,000 times, weighted by the total number of TM-specific mutations observed in each founder.  
582 An empirical *P*-value was calculated as the fraction trials with smaller than observed entropy  
583 value. These *P*-values were then corrected for multiple testing across the 7 TM-specific loci  
584 using the Benjamini-Hochberg procedure. We used the same procedure to test for significant  
585 deviations in the distributions of generic mutations across founders.

## 586 Acknowledgements

587 We thank members of the Kryazhimskiy and Kaçar groups, Joanna Masel, Ryan Gutenkunst,  
588 Suparna Sanyal, Grant Kinsler, Justin Meyer, and Lin Chao for input and feedback. We thank  
589 Alex Pleša, Divjot Kaur, Emily Peñaherrera, Kevin Longoria and Lesly Villarejo for laboratory  
590 assistance. We thank Huanyu Kuo for the analysis of growth-curve data. We thank Eva  
591 Garmendia for providing the recombineering plasmids and Georg Rieckh for providing the  
592 resistance marker plasmids. We thank Benjamin Good for help with his genome sequencing data  
593 analysis pipeline. We thank Kristen Jepsen and the UCSD Institute for Genomic Medicine for  
594 sequencing services and the San Diego Supercomputing Center for providing the computational  
595 environment. BK acknowledges the support by the John Templeton Foundation (#58562 and  
596 #61239); the NASA Exobiology and Evolutionary Biology Program (#H006201406) and the  
597 NASA Astrobiology Institute (#NNA17BB05A). SK acknowledges the support by BWF Career

598 Award at the Scientific Interface (#1010719.01), the Alfred P. Sloan Foundation (#FG-2017-  
599 9227) and the Hellman Foundation.

## 600 Supplemental Figures and Tables

### 601 Figure S1

602 Fitness of founders relative to the E strain vs. growth rate. Related to Figure 1.

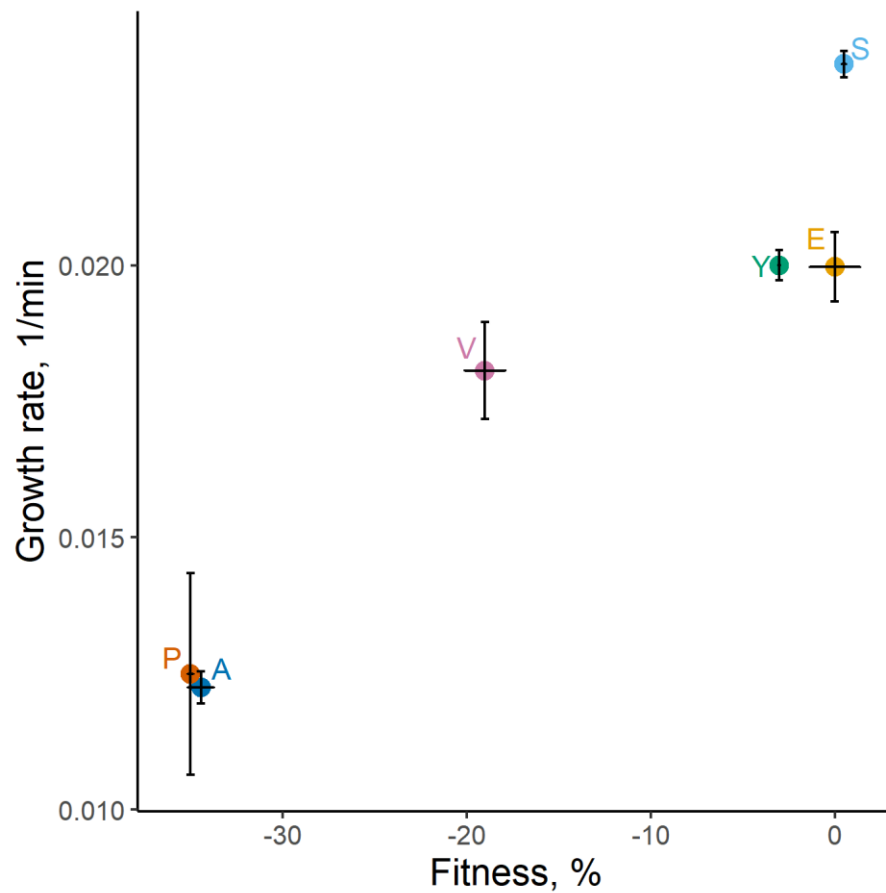

603  
604

605 Figure S2

606 Competitive fitness of the 60 evolved populations relative to their founders, with error bars  
607 showing  $\pm 1$  SEM. Related to figure 1.

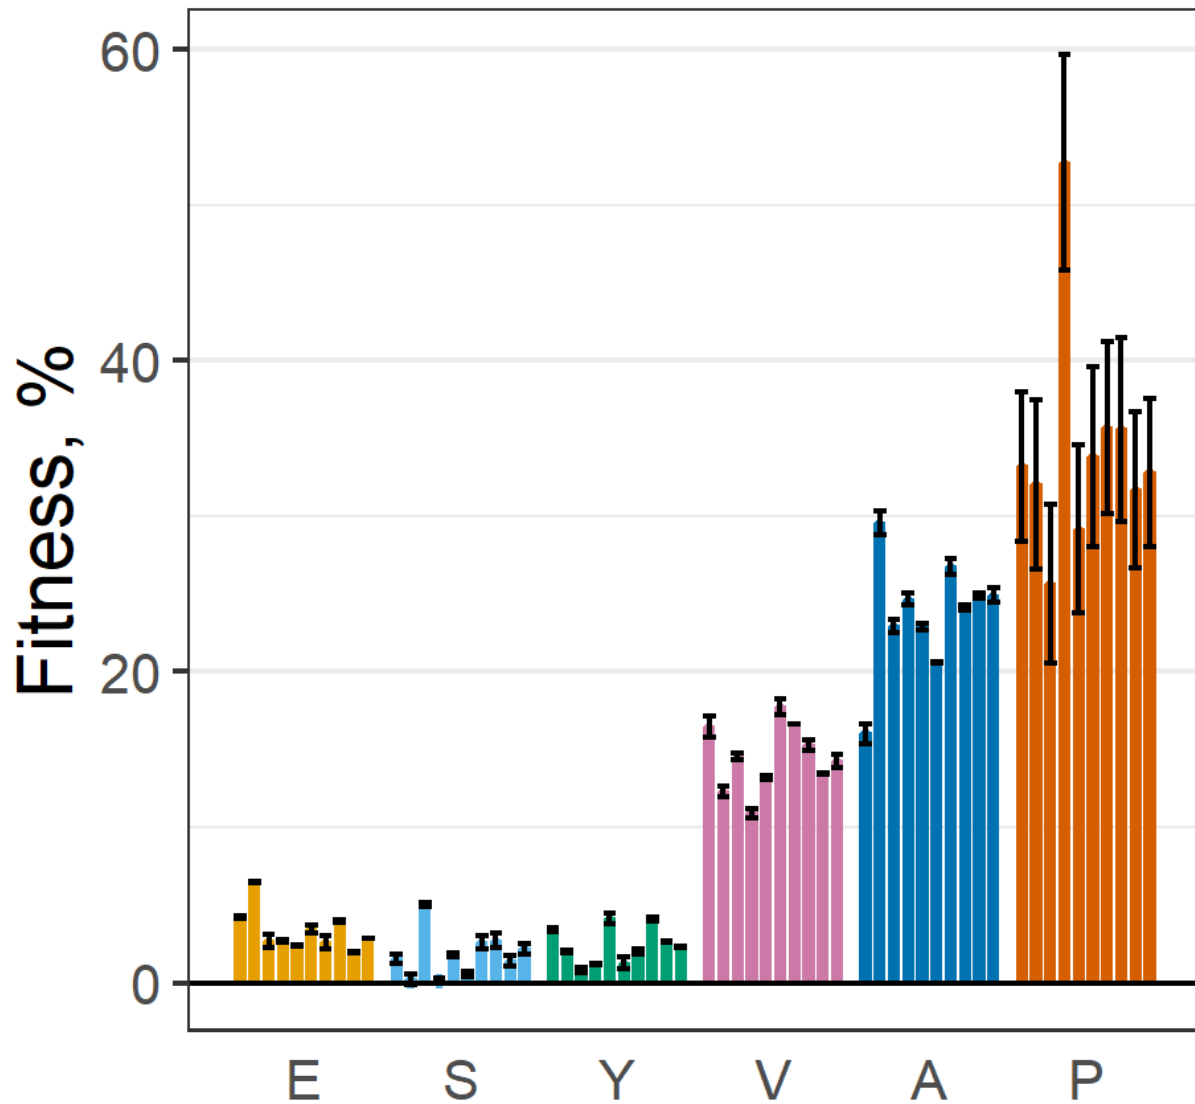

608  
609

610 Figure S3

611 Genome-wide coverage of 11 populations with evidence of *tufA* amplifications shown at one  
612 timepoint where the amplification is detected. The red vertical dashed lines denote the genomic  
613 coordinates ~50kb upstream and downstream of the *tufA* locus. Related to figure 2.

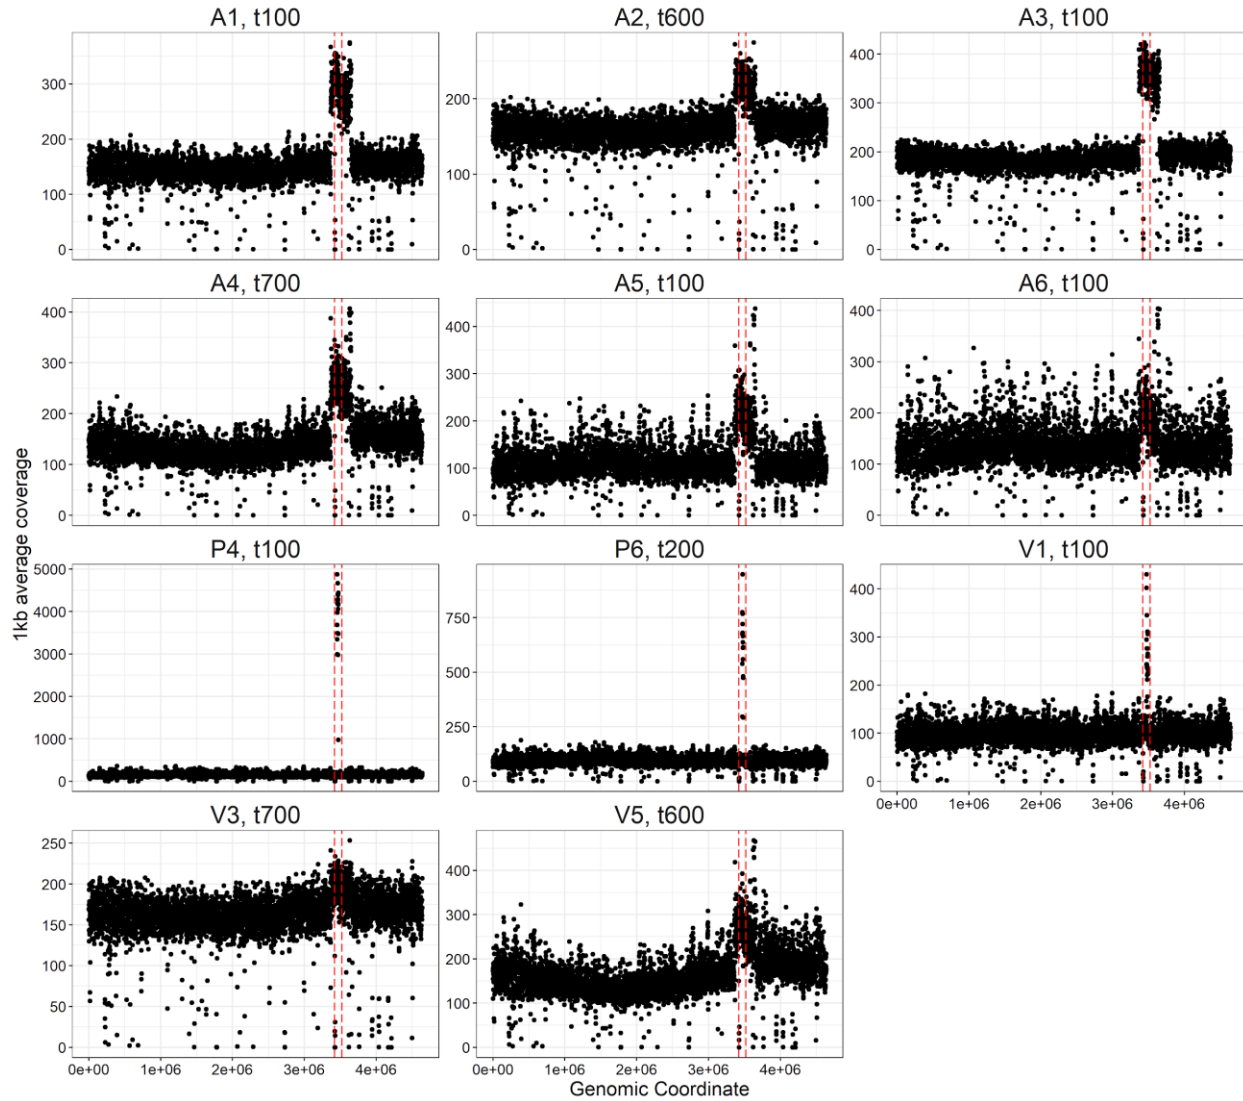

614

## 615 Figure S4

616 Mutational trajectories for all 36 sequenced populations. Each line represents a single mutation  
617 that changed in frequency by > 20%. Thin lines represent mutations in loci that were only  
618 mutated once across the entire dataset, while thick lines are loci that were multiply mutated.  
619 Generic mutations are shown in grey and TM-specific mutations are shown orange. Orange  
620 shading indicates timepoints in which a *tufA* amplification was detected in that population.  
621 Related to figure 2.

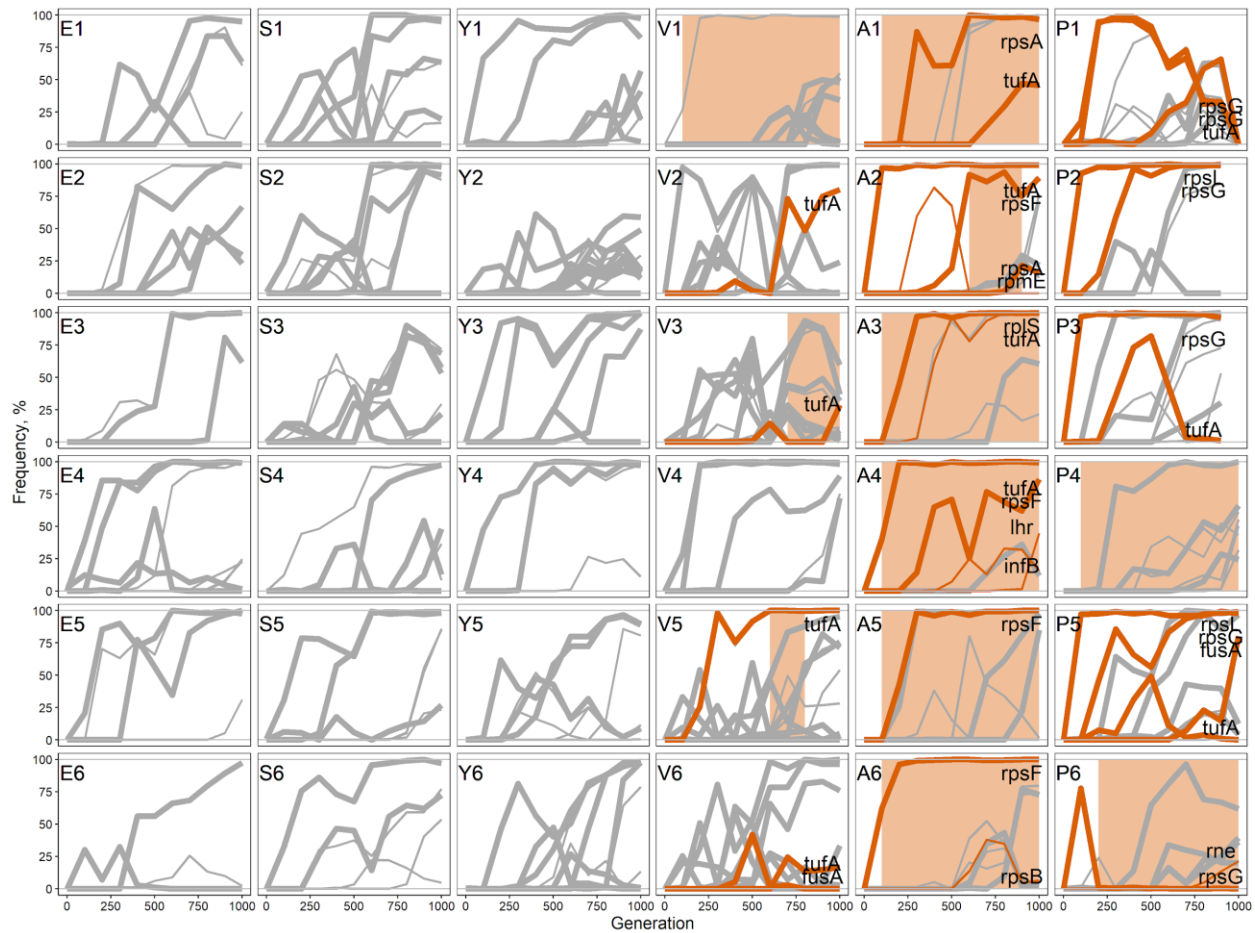

622

623

624

## 625 Figure S5

626 Similar to Figure S4 but for mutations with the relaxed criterion for frequency changes (> 10%  
627 instead of > 20%). This relaxation of our filtering criteria increases the total number of detected  
628 mutations from 288 to 423 and the number of putatively adaptive mutations in multi-hit genes  
629 from 178 to 263. The FDR for putatively adaptive mutations in multi-hit genes is 21.9%. This  
630 relaxed filtering yields only one additional TM-specific mutation in gene *rbbA* in population E5.  
631 Related to figure 2.

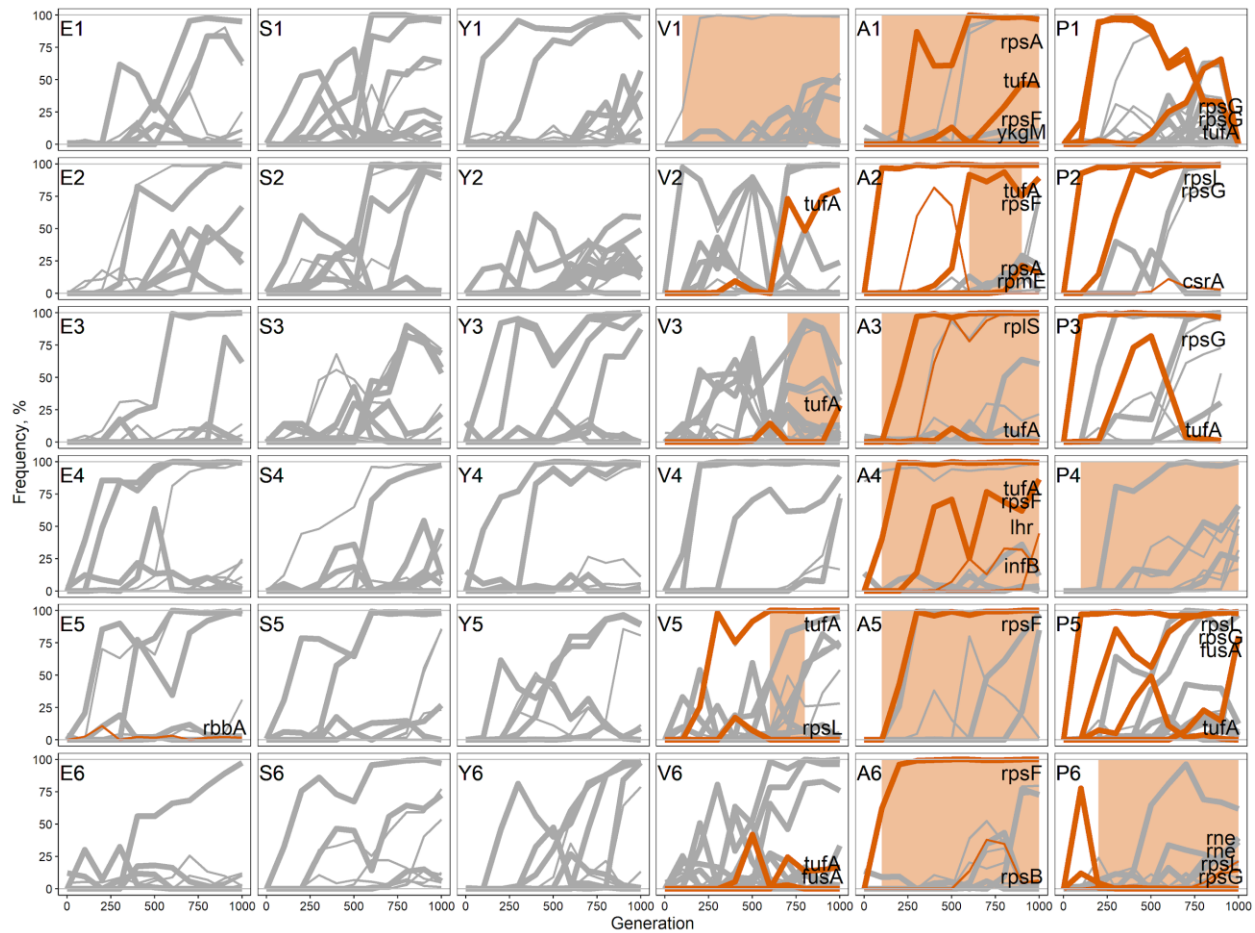

632

633

634

635 Figure S6

636 Similar to Figure S4 but highlighting genes annotated as being involved with cytokinesis (blue-  
637 green) along with translation genes (orange). Gene names are only shown for cytokinesis  
638 mutations. Related to figure 2.

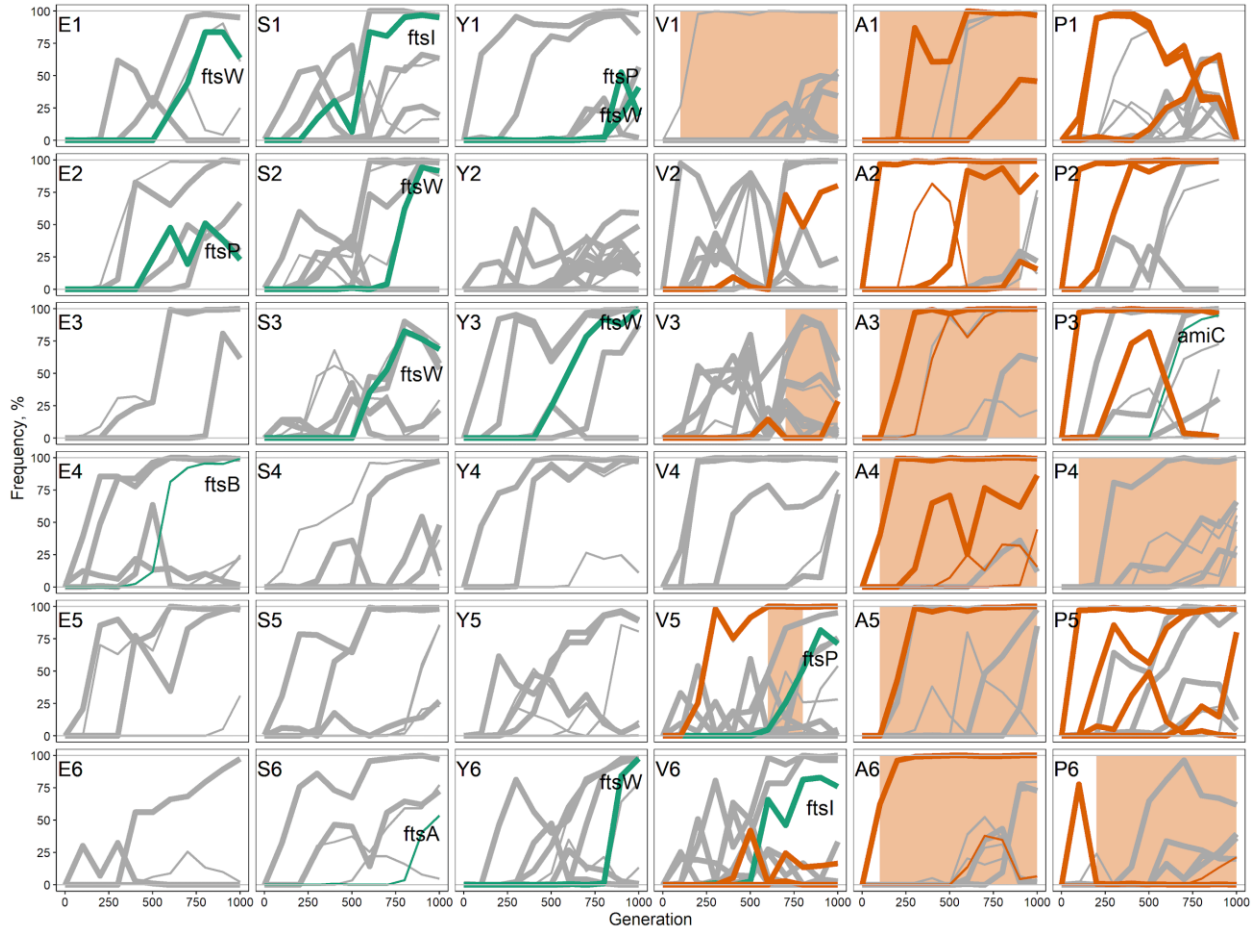

639

640



641 **Figure S7**

642 Similar to Figure 3, but considering mutations ( $n=11$ ) in cytokinesis-specific rather than TM-  
643 specific genes in all founders. “Generic” in this case is all non-cytokinesis-associated genes,  
644 including TM-specific genes. Related to figure 3.

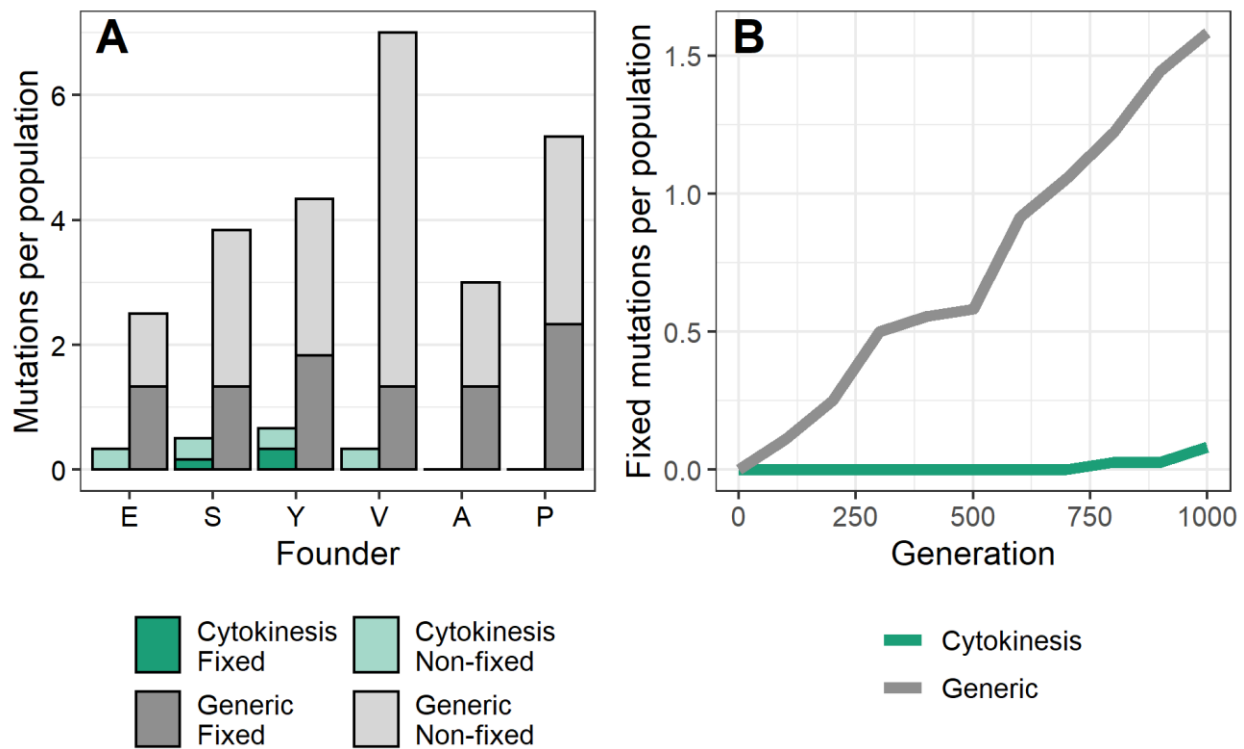

645  
646

647 Figure S8

648 3-way competition between Kanamycin-resistant, Ampicillin-resistant and unmarked strains for  
649 each founder to test for fitness differences between markers. Three replicates were conducted for  
650 each assay. Related to table 1.

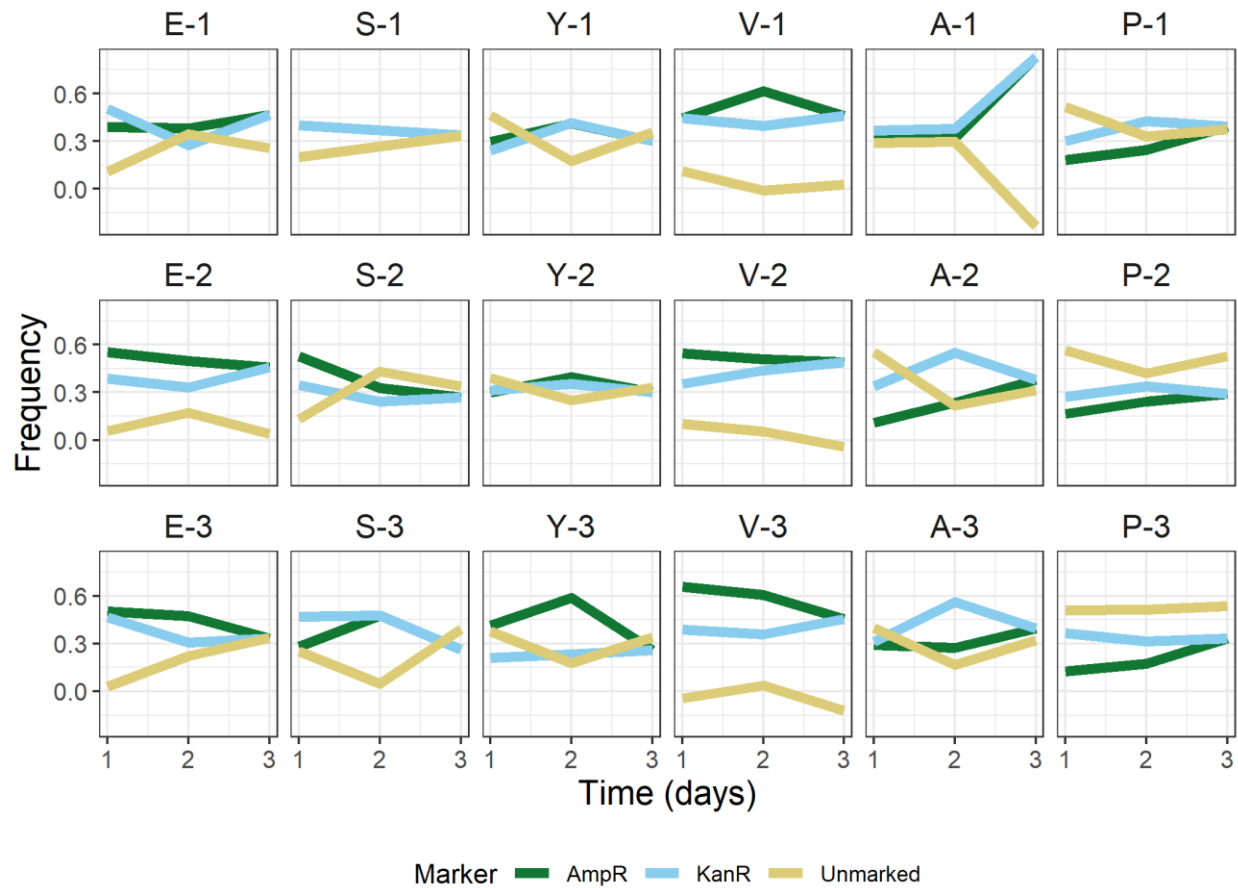

651

652 Figure S9

653 Methods for integrating mutations into the genome. Related to figure 5.

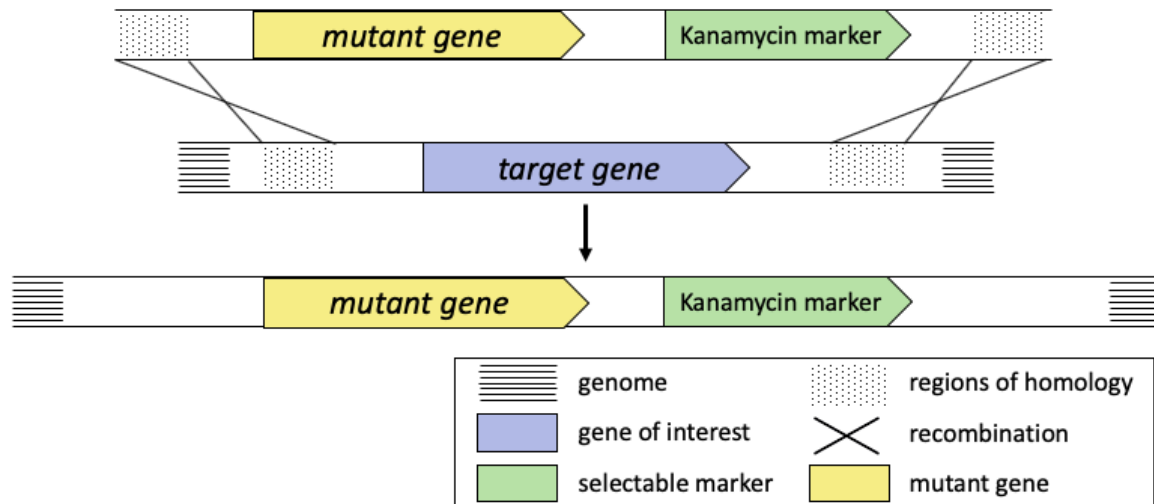

656 **Table S1**

657 List of selected (>20% frequency change) variants. Putatively adaptive (locus repeatedly  
658 mutated) variants, which were used for all analyses after Figure 2, are annotated in the table.

659 **Table S2**

660 Primer names and sequences used for strain construction and validation.

661 **Table S3**

662 Primer names and sequences used for Sanger sequencing validation of 43/45 tested variants.  
663

## 664 References

- 665 1. Simon HA. The Architecture of Complexity. *Proc Am Phil Soc.* 1962;106: 467–482.
- 666 2. Valentine JW, May CL. Hierarchies in Biology and Paleontology. *Paleobiology.* 1996;22: 23–33.
- 667 3. McShea DW. The hierarchical structure of organisms: a scale and documentation of a trend in the  
668 maximum. *Paleobiology.* 2001;27: 405–423.
- 669 4. Ravasz E, Somera AL, Mongru DA, Oltvai ZN, Barabási AL. Hierarchical organization of  
670 modularity in metabolic networks. *Science.* 2002;297: 1551–1555.
- 671 5. Mengistu H, Huizinga J, Mouret J-B, Clune J. The Evolutionary Origins of Hierarchy. *PLoS Comput*  
672 *Biol.* 2016;12: e1004829.
- 673 6. Hartwell LH, Hopfield JJ, Leibler S, Murray AW. From molecular to modular cell biology. *Nature.*  
674 1999;402: C47–52.
- 675 7. Wagner GP, Pavlicev M, Cheverud JM. The road to modularity. *Nat Rev Genet.* 2007;8: 921–931.
- 676 8. Woese C. Molecular mechanics of translation: a reciprocating ratchet mechanism. *Nature.* 1970;226:  
677 817–820.
- 678 9. Frank J. The ribosome--a macromolecular machine par excellence. *Chem Biol.* 2000;7: R133–41.
- 679 10. Blount ZD, Borland CZ, Lenski RE. Historical contingency and the evolution of a key innovation in  
680 an experimental population of *Escherichia coli*. *Proc Natl Acad Sci U S A.* 2008;105: 7899–7906.
- 681 11. Gleizer S, Ben-Nissan R, Bar-On YM, Antonovsky N, Noor E, Zohar Y, et al. Conversion of  
682 *Escherichia coli* to Generate All Biomass Carbon from CO<sub>2</sub>. *Cell.* 2019;179: 1255–1263.e12.
- 683 12. Toprak E, Veres A, Michel J-B, Chait R, Hartl DL, Kishony R. Evolutionary paths to antibiotic  
684 resistance under dynamically sustained drug selection. *Nat Genet.* 2012;44: 101–105.
- 685 13. Gomez JE, Kaufmann-Malaga BB, Wivagg CN, Kim PB, Silvis MR, Renedo N, et al. Ribosomal  
686 mutations promote the evolution of antibiotic resistance in a multidrug environment. *Elife.* 2017;6.  
687 doi:10.7554/eLife.20420
- 688 14. Lieberman TD, Michel J-B, Aingaran M, Potter-Bynoe G, Roux D, Davis MR Jr, et al. Parallel  
689 bacterial evolution within multiple patients identifies candidate pathogenicity genes. *Nat Genet.*  
690 2011;43: 1275–1280.
- 691 15. Lang GI, Rice DP, Hickman MJ, Sodergren E, Weinstock GM, Botstein D, et al. Pervasive genetic  
692 hitchhiking and clonal interference in forty evolving yeast populations. *Nature.* 2013;500: 571–574.
- 693 16. Barroso-Batista J, Sousa A, Lourenço M, Bergman M-L, Sobral D, Demengeot J, et al. The first  
694 steps of adaptation of *Escherichia coli* to the gut are dominated by soft sweeps. *PLoS Genet.*  
695 2014;10: e1004182.
- 696 17. Lourenço M, Ramiro RS, Güleresi D, Barroso-Batista J, Xavier KB, Gordo I, et al. A Mutational  
697 Hotspot and Strong Selection Contribute to the Order of Mutations Selected for during *Escherichia*  
698 *coli* Adaptation to the Gut. *PLoS Genet.* 2016;12: e1006420.

- 699 18. Blundell JR, Schwartz K, Francois D, Fisher DS, Sherlock G, Levy SF. The dynamics of adaptive  
700 genetic diversity during the early stages of clonal evolution. *Nature Ecology & Evolution*. 2019;3:  
701 293–301.
- 702 19. Nguyen Ba AN, Cvijović I, Rojas Echenique JI, Lawrence KR, Rego-Costa A, Liu X, et al. High-  
703 resolution lineage tracking reveals travelling wave of adaptation in laboratory yeast. *Nature*.  
704 2019;575: 494–499.
- 705 20. Garud NR, Good BH, Hallatschek O, Pollard KS. Evolutionary dynamics of bacteria in the gut  
706 microbiome within and across hosts. *PLoS Biol*. 2019;17: e3000102.
- 707 21. Desai MM, Fisher DS. Beneficial mutation–selection balance and the effect of linkage on positive  
708 selection. *Genetics*. 2007;176: 1759–1798.
- 709 22. Neher RA, Shraiman BI. Competition between recombination and epistasis can cause a transition  
710 from allele to genotype selection. *Proc Natl Acad Sci U S A*. 2009;106: 6866–6871.
- 711 23. Good BH, Rouzine IM, Balick DJ, Hallatschek O, Desai MM. Distribution of fixed beneficial  
712 mutations and the rate of adaptation in asexual populations. *Proc Natl Acad Sci U S A*. 2012;109:  
713 4950–4955.
- 714 24. Levy SF, Blundell JR, Venkataram S, Petrov DA, Fisher DS, Sherlock G. Quantitative evolutionary  
715 dynamics using high-resolution lineage tracking. *Nature*. 2015;519: 181.
- 716 25. Lynch M, Field MC, Goodson HV, Malik HS, Pereira-Leal JB, Roos DS, et al. Evolutionary cell  
717 biology: two origins, one objective. *Proc Natl Acad Sci U S A*. 2014;111: 16990–16994.
- 718 26. Kryazhimskiy S, Tkacik G, Plotkin JB. The dynamics of adaptation on correlated fitness landscapes.  
719 *Proc Natl Acad Sci U S A*. 2009;106: 18638–18643.
- 720 27. Hartl DL, Dykhuizen DE, Dean AM. Limits of adaptation: the evolution of selective neutrality.  
721 *Genetics*. 1985;111: 655–674.
- 722 28. Hartl DL, Taubes CH. Towards a theory of evolutionary adaptation. *Genetica*. 1998;102-103: 525–  
723 533.
- 724 29. Lynch M. Evolutionary layering and the limits to cellular perfection. *Proc Natl Acad Sci U S A*.  
725 2012.
- 726 30. Nourmohammad A, Schiffels S, Lässig M. Evolution of molecular phenotypes under stabilizing  
727 selection. *J Stat Mech: Theory Exp*. 2013;2013: P01012.
- 728 31. Lynch M. Evolutionary layering and the limits to cellular perfection. *Proceedings of the National*  
729 *Academy of*. 2012.
- 730 32. Goyal S, Balick DJ, Jerison ER, Neher RA, Shraiman BI, Desai MM. Dynamic Mutation–Selection  
731 Balance as an Evolutionary Attractor. *Genetics*. 2012;191: 1309–1319.
- 732 33. Rice DP, Good BH, Desai MM. The evolutionarily stable distribution of fitness effects. *Genetics*.  
733 2015;200: 321–329.
- 734 34. Barton NH. Linkage and the limits to natural selection. *Genetics*. 1995;140: 821–841.

- 735 35. Gerrish PJ, Lenski RE. The fate of competing beneficial mutations in an asexual population.  
736 *Genetica*. 1998;102-103: 127–144.
- 737 36. Schiffels S, SzölloSI GJ, Mustonen V, Lässig M. Emergent neutrality in adaptive asexual evolution.  
738 *Genetics*. 2011;189: 1361–1375.
- 739 37. Gresham D, Desai MM, Tucker CM, Jenq HT, Pai DA, Ward A, et al. The repertoire and dynamics  
740 of evolutionary adaptations to controlled nutrient-limited environments in yeast. *PLoS Genet*.  
741 2008;4: e1000303.
- 742 38. Szamecz B, Boross G, Kalapis D, Kovács K, Fekete G, Farkas Z, et al. The genomic landscape of  
743 compensatory evolution. *PLoS Biol*. 2014;12: e1001935.
- 744 39. Hong J, Gresham D. Molecular specificity, convergence and constraint shape adaptive evolution in  
745 nutrient-poor environments. *PLoS Genet*. 2014;10: e1004041.
- 746 40. Payen C, Di Rienzi SC, Ong GT, Pogachar JL, Sanchez JC, Sunshine AB, et al. The dynamics of  
747 diverse segmental amplifications in populations of *Saccharomyces cerevisiae* adapting to strong  
748 selection. *G3* . 2014;4: 399–409.
- 749 41. Couñago R, Chen S, Shamoo Y. In vivo molecular evolution reveals biophysical origins of  
750 organismal fitness. *Mol Cell*. 2006;22: 441–449.
- 751 42. Chou H-H, Delaney NF, Draghi JA, Marx CJ. Mapping the fitness landscape of gene expression  
752 uncovers the cause of antagonism and sign epistasis between adaptive mutations. *PLoS Genet*.  
753 2014;10: e1004149.
- 754 43. Michener JK, Neves AAC, Vuilleumier S, Bringel F, Marx CJ. Effective use of a horizontally-  
755 transferred pathway for dichloromethane catabolism requires post-transfer refinement. *Elife*.  
756 2014;3: e04279.
- 757 44. Venkataram S, Dunn B, Li Y, Agarwala A, Chang J, Ebel ER, et al. Development of a  
758 Comprehensive Genotype-to-Fitness Map of Adaptation-Driving Mutations in Yeast. *Cell*.  
759 2016;166: 1585–1596.e22.
- 760 45. Jerison ER, Kryazhimskiy S, Mitchell JK, Bloom JS, Kruglyak L, Desai MM. Genetic variation in  
761 adaptability and pleiotropy in budding yeast. *Elife*. 2017;6.
- 762 46. Rojas Echenique JI, Kryazhimskiy S, Nguyen Ba AN, Desai MM. Modular epistasis and the  
763 compensatory evolution of gene deletion mutants. *PLoS Genet*. 2019;15: e1007958.
- 764 47. Rodrigues JV, Shakhnovich EI. Adaptation to mutational inactivation of an essential gene converges  
765 to an accessible suboptimal fitness peak. *Elife*. 2019;8. doi:10.7554/eLife.50509
- 766 48. Laan L, Koschwanez JH, Murray AW. Evolutionary adaptation after crippling cell polarization  
767 follows reproducible trajectories. *Elife*. 2015;4. doi:10.7554/eLife.09638
- 768 49. Tenaillon O, Rodríguez-Verdugo A, Gaut RL, McDonald P, Bennett AF, Long AD, et al. The  
769 molecular diversity of adaptive convergence. *Science*. 2012;335: 457–461.
- 770 50. Kryazhimskiy S, Rice DP, Jerison ER, Desai MM. Global epistasis makes adaptation predictable  
771 despite sequence-level stochasticity. *Science*. 2014;344: 1519–1522.

- 772 51. Good BH, McDonald MJ, Barrick JE, Lenski RE, Desai MM. The dynamics of molecular evolution  
773 over 60,000 generations. *Nature*. 2017;551: 45–50.
- 774 52. Castoe TA, de Koning API, Kim H-M, Gu W, Noonan BP, Naylor G, et al. Evidence for an ancient  
775 adaptive episode of convergent molecular evolution. *Proc Natl Acad Sci U S A*. 2009;106: 8986–  
776 8991.
- 777 53. Chen L, DeVries AL, Cheng CH. Convergent evolution of antifreeze glycoproteins in Antarctic  
778 notothenioid fish and Arctic cod. *Proc Natl Acad Sci U S A*. 1997;94: 3817–3822.
- 779 54. Rosenblum EB, Römler H, Schöneberg T, Hoekstra HE. Molecular and functional basis of  
780 phenotypic convergence in white lizards at White Sands. *Proc Natl Acad Sci U S A*. 2010;107:  
781 2113–2117.
- 782 55. Ramakrishnan V. Ribosome structure and the mechanism of translation. *Cell*. 2002;108: 557–572.
- 783 56. Williamson JR. The ribosome at atomic resolution. *Cell*. 2009;139: 1041–1043.
- 784 57. Melnikov S, Ben-Shem A, Garreau de Loubresse N, Jenner L, Yusupova G, Yusupov M. One core,  
785 two shells: bacterial and eukaryotic ribosomes. *Nat Struct Mol Biol*. 2012;19: 560–567.
- 786 58. Kaçar B, Garmendia E, Tuncbag N, Andersson DI, Hughes D. Functional Constraints on Replacing  
787 an Essential Gene with Its Ancient and Modern Homologs. *MBio*. 2017;8. doi:10.1128/mBio.01276-  
788 17
- 789 59. Miller DL, Weissbach H. Factors involved in the transfer of aminoacyl-tRNA to the ribosome. In:  
790 Petska S, Weissbach H, editors. *Molecular mechanisms of protein biosynthesis*. Academic Press,  
791 London; 1977. pp. 323–373.
- 792 60. Nilsson J, Nissen P. Elongation factors on the ribosome. *Curr Opin Struct Biol*. 2005;15: 349–354.
- 793 61. Scott M, Gunderson CW, Mateescu EM, Zhang Z, Hwa T. Interdependence of Cell Growth and  
794 Gene Expression: Origins and Consequences. *Science*. 2010;330: 1099–1102.
- 795 62. Tubulekas I, Hughes D. Suppression of rpsL phenotypes by tuf mutations reveals a unique  
796 relationship between translation elongation and growth rate. *Mol Microbiol*. 1993;7: 275–284.
- 797 63. MacLean RC, Perron GG, Gardner A. Diminishing returns from beneficial mutations and pervasive  
798 epistasis shape the fitness landscape for rifampicin resistance in *Pseudomonas aeruginosa*. *Genetics*.  
799 2010;186: 1345–1354.
- 800 64. Schnell R, Abdulkarim F, Kálmán M, Isaksson LA. Functional EF-Tu with large C-terminal  
801 extensions in an *E. coli* strain with a precise deletion of both chromosomal tuf genes. *FEBS Lett*.  
802 2003;538: 139–144.
- 803 65. Lenski RE, Mongold JA, Sniegowski PD, Travisano M, Vasi F, Gerrish PJ, et al. Evolution of  
804 competitive fitness in experimental populations of *E. coli*: what makes one genotype a better  
805 competitor than another? *Antonie Van Leeuwenhoek*. 1998;73: 35–47.
- 806 66. Li Y, Venkataram S, Agarwala A, Dunn B, Petrov DA, Sherlock G, et al. Hidden Complexity of  
807 Yeast Adaptation under Simple Evolutionary Conditions. *Curr Biol*. 2018;28: 515–525.e6.
- 808 67. Manhart M, Adkar BV, Shakhnovich EI. Trade-offs between microbial growth phases lead to



- 809 frequency-dependent and non-transitive selection. *Proc Biol Sci.* 2018;285.
- 810 68. Vasi F, Travisano M, Lenski RE. Long-Term Experimental Evolution in *Escherichia coli*. II.  
811 Changes in Life-History Traits During Adaptation to a Seasonal Environment. *Am Nat.* 1994;144:  
812 432–456.
- 813 69. Utnes ALG, Sørum V, Hülter N, Primicerio R, Hegstad J, Kloos J, et al. Growth phase-specific  
814 evolutionary benefits of natural transformation in *Acinetobacter baylyi*. *ISME J.* 2015;9: 2221–2231.
- 815 70. Khan AI, Dinh DM, Schneider D, Lenski RE, Cooper TF. Negative epistasis between beneficial  
816 mutations in an evolving bacterial population. *Science.* 2011;332: 1193–1196.
- 817 71. Wünsche A, Dinh DM, Satterwhite RS, Arenas CD, Stoebel DM, Cooper TF. Diminishing-returns  
818 epistasis decreases adaptability along an evolutionary trajectory. *Nat Ecol Evol.* 2017;1: 61.
- 819 72. Wisner MJ, Ribbeck N, Lenski RE. Long-term dynamics of adaptation in asexual populations. *Science.*  
820 2013;342: 1364–1367.
- 821 73. Schoustra SE, Bataillon T, Gifford DR, Kassen R. The properties of adaptive walks in evolving  
822 populations of fungus. *PLoS Biol.* 2009;7: e1000250.
- 823 74. Couce A, Tenaillon OA. The rule of declining adaptability in microbial evolution experiments. *Front*  
824 *Genet.* 2015;6: 99.
- 825 75. Herron MD, Doebeli M. Parallel evolutionary dynamics of adaptive diversification in *Escherichia*  
826 *coli*. *PLoS Biol.* 2013;11: e1001490.
- 827 76. Kvitek DJ, Sherlock G. Whole genome, whole population sequencing reveals that loss of signaling  
828 networks is the major adaptive strategy in a constant environment. *PLoS Genet.* 2013;9: e1003972.
- 829 77. Asai T, Zaporozhets D, Squires C, Squires CL. An *Escherichia coli* strain with all chromosomal rRNA  
830 operons inactivated: complete exchange of rRNA genes between bacteria. *Proc. Natl. Acad. Sci. U.*  
831 *S. A.* 1999. pp. 1971–1976.
- 832 78. Dutheil JY, Jossinet F, Westhof E. Base pairing constraints drive structural epistasis in ribosomal  
833 RNA sequences. *Mol Biol Evol.* 2010;27: 1868–1876.
- 834 79. Barreto FS, Burton RS. Evidence for compensatory evolution of ribosomal proteins in response to  
835 rapid divergence of mitochondrial rRNA. *Mol Biol Evol.* 2013;30: 310–314.
- 836 80. Sloan DB, Triant DA, Wu M, Taylor DR. Cytonuclear interactions and relaxed selection accelerate  
837 sequence evolution in organelle ribosomes. *Mol Biol Evol.* 2014;31: 673–682.
- 838 81. Shah P, McCandlish DM, Plotkin JB. Contingency and entrenchment in protein evolution under  
839 purifying selection. *Proc Natl Acad Sci U S A.* 2015;112: E3226–35.
- 840 82. Starr TN, Flynn JM, Mishra P, Bolon DNA, Thornton JW. Pervasive contingency and entrenchment  
841 in a billion years of Hsp90 evolution. *Proc Natl Acad Sci U S A.* 2018;115: 4453–4458.
- 842 83. Blount ZD, Lenski RE, Losos JB. Contingency and determinism in evolution: Replaying life’s tape.  
843 *Science.* 2018;362. Available: <https://www.ncbi.nlm.nih.gov/pubmed/30409860>
- 844 84. Orr HA. The distribution of fitness effects among beneficial mutations. *Genetics.* 2003;163: 1519–

- 845 1526.
- 846 85. Orr HA. The distribution of fitness effects among beneficial mutations in Fisher's geometric model  
847 of adaptation. *J Theor Biol.* 2006;238: 279–285.
- 848 86. Martin G, Lenormand T. The distribution of beneficial and fixed mutation fitness effects close to an  
849 optimum. *Genetics.* 2008;179: 907–916.
- 850 87. Fisher R. *The genetical theory of natural selection.* Oxford University Press; 1930.
- 851 88. Tenaillon O. The Utility of Fisher's Geometric Model in Evolutionary Genetics. *Annu Rev Ecol*  
852 *Evol Syst.* 2014;45: 179–201.
- 853 89. Wagner A. Neutralism and selectionism: a network-based reconciliation. *Nat Rev Genet.* 2008;9:  
854 965–974.
- 855 90. Schaper S, Johnston IG, Louis AA. Epistasis can lead to fragmented neutral spaces and contingency  
856 in evolution. *Proc Biol Sci.* 2012;279: 1777–1783.
- 857 91. Newman MEJ, Engelhardt R. Effects of selective neutrality on the evolution of molecular species.  
858 *Proc Roy Soc B: Biological Sciences.* 1998;265: 1333–1338.
- 859 92. Lind PA, Tobin C, Berg OG, Kurland CG, Andersson DI. Compensatory gene amplification restores  
860 fitness after inter-species gene replacements. *Mol Microbiol.* 2010;75: 1078–1089.
- 861 93. Kacar B, Ge X, Sanyal S, Gaucher EA. Experimental Evolution of *Escherichia coli* Harboring an  
862 Ancient Translation Protein. *J Mol Evol.* 2017;84: 69–84.
- 863 94. Chou H-H, Chiu H-C, Delaney NF, Segrè D, Marx CJ. Diminishing returns epistasis among  
864 beneficial mutations decelerates adaptation. *Science.* 2011;332: 1190–1192.
- 865 95. Wei X, Zhang J. Patterns and mechanisms of diminishing returns from beneficial mutations. *Mol*  
866 *Biol Evol.* 2019.
- 867 96. Zaslaver A, Mayo AE, Rosenberg R, Bashkin P, Sberro H, Tsalyuk M, et al. Just-in-time  
868 transcription program in metabolic pathways. *Nat Genet.* 2004;36: 486–491.
- 869 97. Chung CT, Niemela SL, Miller RH. One-step preparation of competent *Escherichia coli*:  
870 transformation and storage of bacterial cells in the same solution. *Proc Natl Acad Sci U S A.*  
871 1989;86: 2172–2175.
- 872 98. Geissmann Q. OpenCFU, a new free and open-source software to count cell colonies and other  
873 circular objects. *PLoS One.* 2013;8: e54072.
- 874 99. Baym M, Kryazhimskiy S, Lieberman TD, Chung H, Desai MM, Kishony R. Inexpensive  
875 multiplexed library preparation for megabase-sized genomes. *PLoS One.* 2015;10: e0128036.
- 876 100. Wang K, Li M, Hakonarson H. ANNOVAR: functional annotation of genetic variants from high-  
877 throughput sequencing data. *Nucleic Acids Res.* 2010;38: e164.
- 878 101. Trapnell C, Roberts A, Goff L, Pertea G, Kim D, Kelley DR, et al. Differential gene and  
879 transcript expression analysis of RNA-seq experiments with TopHat and Cufflinks. *Nat Protoc.*  
880 2012;7: 562–578.

881 102. Li H, Handsaker B, Wysoker A, Fennell T, Ruan J, Homer N, et al. The Sequence  
882 Alignment/Map format and SAMtools. *Bioinformatics*. 2009;25: 2078–2079.

883
